# Supplementary material for: Drosophila mechanical nociceptors preferentially sense localized poking
Source: eLife journal article supplement (doi:10.7554/elife.76574), 2022-10-06
Supplement: supp [file Figure 2-figure supplement 1_source data 1.xlsx]

## Sheet: Panel A
c1da F/F0 to 4 mN proximal stimuli with 60 μm probe	p value of U-test		the wt c4da data are shown in Figure. 2E sheet in Figure2_source data table
1.08365	c4da <-> c1da: 2.9845E-6
0.94079
0.93079
0.92918
0.9381
0.98229
0.97027
0.97899
0.91537
1.14121
1.00532
0.89648
1.00807
0.91525

## Sheet: Panel C
30 μm probe data						60 μm probe data
scatter data		average data				scatter data		average data
force (mN)	F/F0	force (mN)	mean F/F0	F/F0 error (se)		force (mN)	F/F0	force (mN)	mean F/F0	F/F0 error (se)
0.13636	1.02603	0.13636	1.10846	0.13516		0.51667	1.02461	0.51667	1.93433	0.43856
0.13636	0.90374	0.35769	1.84158	0.3091		0.51667	1.58821	1.30556	2.00353	0.23371
0.13636	0.98541	0.71667	2.02001	0.61877		0.51667	1.27133	2.52	2.27116	0.49412
0.13636	0.95791	1.31538	2.26249	0.47734		0.51667	1.40214	3.48	2.45178	0.36202
0.13636	1.29192	2.45625	2.16537	0.3917		0.51667	2.47421	5.8	2.23387	0.42828
0.13636	1.37026					0.51667	2.20913	7.54	2.33502	0.4398
0.13636	0.9736					0.51667	0.96797
0.13636	1.77104					0.51667	4.29941
0.13636	0.98893					0.51667	1.11264
0.13636	0.95656					0.51667	1.21143
0.13636	0.96761					0.51667	1.9608
0.35769	1.35686					0.51667	3.69011
0.35769	1.8898					1.30556	3.82074
0.35769	1.72546					1.30556	1.51
0.35769	2.5233					1.30556	2.47216
0.35769	1.09639					1.30556	4.01023
0.35769	2.41231					1.30556	1.62193
0.35769	1.02151					1.30556	1.5924
0.35769	1.25417					1.30556	1.75495
0.35769	1.80302					1.30556	1.11847
0.35769	3.61777					1.30556	2.92
0.35769	1.73524					1.30556	2.56889
0.35769	1.40862					1.30556	1.47005
0.35769	2.09603					1.30556	1.73
0.71667	1.34537					1.30556	1.98689
0.71667	4.43808					1.30556	1.13967
0.71667	1.52952					1.30556	1.07
0.71667	1.28367					1.30556	3.29611
0.71667	0.97996					1.30556	1.03764
0.71667	1.86225					1.30556	2.16463
0.71667	3.72987					1.30556	0.96479
0.71667	1.85134					1.30556	1.45
0.71667	1.16006					1.30556	3.58499
1.31538	4.64436					1.30556	1.56926
1.31538	2.62352					1.30556	1.58
1.31538	1.84184					1.30556	1.65102
1.31538	1.36833					2.52	0.93873
1.31538	3.71347					2.52	0.98708
1.31538	1.98752					2.52	1.21091
1.31538	2.05813					2.52	1.52668
1.31538	2.26571					2.52	1.5405
1.31538	1.70333					2.52	3.32
1.31538	1.5658					2.52	3.23
1.31538	1.73572					2.52	1.49314
1.31538	1.79636					2.52	1.6
1.31538	2.10832					2.52	3.47187
2.45625	1.93975					2.52	4.41377
2.45625	2.34548					2.52	3.52124
2.45625	3.98739					3.48	1.33629
2.45625	1.61728					3.48	2.37813
2.45625	2.05908					3.48	2.18422
2.45625	1.80012					3.48	4.12785
2.45625	1.65651					3.48	2.96723
2.45625	1.91735					3.48	2.17545
						3.48	2.39238
						3.48	2.86
						3.48	3.37861
						3.48	1.7031
						3.48	1.46634
						5.8	1.32144
						5.8	1.82317
						5.8	1.46115
						5.8	2.39199
						5.8	2.99
						5.8	1.82
						5.8	2.46
						5.8	3.60319
						7.54	3.99541
						7.54	2.99
						7.54	2.46088
						7.54	1.85181
						7.54	1.8389
						7.54	1.55619
						7.54	2.04492
						7.54	1.94209

## Sheet: Panel E
wt c3da				the wt c4da data are shown in Figure. 3B sheet in Figure3_source data table
distance from soma (μm)	intersection density (μm)	intersection density error (std) (μm)
10	0.13376	0.04152
15	0.09766	0.02848
20	0.08918	0.01816
25	0.06878	0.0171
30	0.07218	0.02946
35	0.0637	0.02134
40	0.0621	0.0248
45	0.05662	0.02348
50	0.05732	0.0234
55	0.04632	0.0192
60	0.04778	0.02732
65	0.04802	0.02436
70	0.04004	0.01488
75	0.04162	0.01542
80	0.0398	0.01618
85	0.03372	0.0127
90	0.03822	0.02202
95	0.03688	0.01836
100	0.03758	0.02082
105	0.03336	0.01832
110	0.02722	0.01204
115	0.02382	0.0099
120	0.026	0.00982
125	0.02904	0.01514
130	0.0245	0.0133
135	0.02548	0.0142
140	0.03184	0.01754
145	0.02416	0.0111
150	0.02124	0.00808
155	0.02096	0.00672
160	0.02308	0.0095
165	0.02124	0.00654
170	0.02174	0.00768
175	0.0233	0.00838
180	0.02476	0.006
185	0.02376	0.00744
190	0.02078	0.00876
195	0.02156	0.01042
200	0.02198	0.0083
205	0.02392	0.00628
210	0.02426	0.00878
215	0.0231	0.00722
220	0.022	0.00658
225	0.01954	0.00636
230	0.02188	0.00582
235	0.02006	0.00714
240	0.01804	0.00868
245	0.01976	0.01012
250	0.01988	0.01042
255	0.01998	0.01224
260	0.01568	0.0085
265	0.01538	0.00708
270	0.01816	0.00928
275	0.01552	0.00736
280	0.01546	0.01004
285	0.0134	0.00778
290	0.01054	0.00802
295	0.01106	0.00796
300	0.00928	0.00564
305	0.01254	0.00208
310	0.01028	0.0037
315	0.01112	0.00534
320	0.00962	0.00904
325	0.00882	0.00612
330	0.00998	0.00678
335	0.01394	0.00956
340	0.00906	0.00516
345	0.00892	0.00282
350	0.0097	0.00139
355	0.00688	0.00424
360	0.00384	0.00184
365	0.0029	0.00182
370	0.00344	0.00149
375	0.0051	0
380	0.00838	0
385	0.0033	0
390	0.00572	0
395	0.00646	0
400	0.00159	0
405	0.000786348	0
410	0.00077676	0
415	0.0007674	0
420	0.000758266	0
425	0.000749344	0
430	0.00222	0
435	0.000732118	0

## Sheet: Panel F
30 μm probe stimuli				60 μm probe stimuli
F/F0 to 4 mN proximal stimuli	F/F0 to 4 mN distal stimuli	p value of U-test		F/F0 to 4 mN proximal stimuli	F/F0 to 4 mN distal stimuli	p value of U-test
1.85134	0.99852	proximal <-> dsital: 6.15164E-6		4.12785	1.00264	proximal <-> dsital: 3.74545E-4
1.16006	1.15292			2.46088	1.20066
4.64436	1.14396			2.96723	1.05518
2.62352	1.15186			2.17545	1.24651
1.84184	1.0417			2.39238	1.18512
1.36833	1.03263			2.86	1.90816
3.71347	1.06003			3.37861	2.24799
1.98752	1.23761			1.7031	1.0388
2.05813	1.02937			1.46634	1.15274
2.26571	1.08093			1.32144	1.19096
1.70333	1.25308			1.82317	1.94868
1.5658	1.20126			1.46115	1.47419
1.73572	1.09238			2.21235	1.11451
1.79636	0.96373				1.04233
2.10832	1.04279				1.95554
					1.06669
					1.0191

## Sheet: Panel G
30 μm probe distal stimuli						60 μm probe distal stimuli						100 μm probe distal stimuli						200 μm probe distal stimuli
scatter data		average data				scatter data		average data				scatter data		average data				scatter data		average data
force (mN)	F/F0	force (mN)	mean F/F0	F/F0 error (se)		force (mN)	F/F0	force (mN)	mean F/F0	F/F0 error (se)		force (mN)	F/F0	force (mN)	mean F/F0	F/F0 error (se)		force (mN)	F/F0	force (mN)	mean F/F0	F/F0 error (se)
0.5	1.03026	0.5	1.08351	0.05567		0.68824	1.00114	0.68824	1.06223	0.02957		2.08846	1.5333	2.08846	1.35121	0.14421		2.7375	1.11248	2.7375	1.4211	0.12537
0.5	1.14128	0.825	1.07511	0.04209		0.68824	1.2067	1.51875	1.1779	0.05325		2.08846	1.01305	3.43636	1.50224	0.17892		2.7375	2.848	4.05714	1.54036	0.14746
0.5	1.08839	1.26429	1.10602	0.02387		0.68824	1.23164	2.64	1.24657	0.08154		2.08846	1.07193	6.08182	1.5967	0.18214		2.7375	1.59728	6.00652	1.70348	0.14039
0.5	1.03667	2.01563	1.15282	0.0476		0.68824	1.04825	3.95294	1.34411	0.10129		2.08846	1.1531	8.36667	1.88	0.22889		2.7375	1.078	9.64286	2.05849	0.11904
0.5	0.98427					0.68824	1.40454	6.23	1.4051	0.0999		2.08846	1.48644					2.7375	2.10858
0.5	0.98656					0.68824	1.04268					2.08846	1.06956					2.7375	1.39337
0.5	1.47792					0.68824	1.07036					2.08846	1.06002					2.7375	1.3989
0.5	0.96962					0.68824	1.02027					2.08846	1.10566					2.7375	1.10383
0.5	1.03665					0.68824	0.95157					2.08846	1.07209					2.7375	1.03734
0.825	1.04842					0.68824	0.9868					2.08846	1.59435					2.7375	1.11259
0.825	1.02686					0.68824	1.07539					2.08846	0.96926					2.7375	1.87392
0.825	1.01239					0.68824	1.07062					2.08846	1.62689					2.7375	1.17096
0.825	1.04954					0.68824	0.99449					2.08846	2.81012					2.7375	1.25891
0.825	1.04525					0.68824	0.94045					3.43636	2.65189					2.7375	1.31127
0.825	1.07568					0.68824	1.03437					3.43636	2.1517					2.7375	1.2078
0.825	1.34425					0.68824	0.95782					3.43636	1.01408					2.7375	1.1244
0.825	0.99852					0.68824	1.02073					3.43636	1.06573					4.05714	1.40954
1.26429	1.15292					1.51875	1.12272					3.43636	1.87738					4.05714	1.09508
1.26429	1.14396					1.51875	1.04907					3.43636	1.55717					4.05714	1.55162
1.26429	1.15186					1.51875	1.06139					3.43636	1.15839					4.05714	1.2315
1.26429	1.0417					1.51875	1.26474					3.43636	1.0658					4.05714	1.25486
1.26429	1.03263					1.51875	1.5583					3.43636	1.05213					4.05714	1.03352
1.26429	1.06003					1.51875	1.03068					3.43636	1.03448					4.05714	1.07976
1.26429	1.23761					1.51875	1.25782					3.43636	1.89583					4.05714	1.39637
1.26429	1.02937					1.51875	0.99769					6.08182	2.39447					4.05714	1.04331
1.26429	1.08093					1.51875	1.437					6.08182	1.17962					4.05714	1.28949
1.26429	1.25308					1.51875	1.03459					6.08182	1.91756					4.05714	1.81337
1.26429	1.20126					1.51875	1.09423					6.08182	1.1523					4.05714	1.5947
1.26429	1.09238					1.51875	1.10094					6.08182	1.72381					4.05714	1.66354
1.26429	0.96373					1.51875	0.96592					6.08182	1.17634					4.05714	2.07059
1.26429	1.04279					1.51875	1.04738					6.08182	1.48054					4.05714	1.10993
2.01563	1.04734					1.51875	1.16722					6.08182	1.38691					4.05714	1.61039
2.01563	0.91663					1.51875	1.65675					6.08182	1.26436					4.05714	0.98905
2.01563	1.02787					2.64	1.13133					6.08182	2.8397					4.05714	1.25077
2.01563	1.23942					2.64	1.02285					6.08182	1.04814					4.05714	1.45884
2.01563	1.19909					2.64	1.30443					8.36667	3.19906					4.05714	3.9195
2.01563	1.43759					2.64	1.18996					8.36667	2.2678					4.05714	2.48195
2.01563	1.04763					2.64	1.70727					8.36667	1.18296					6.00652	1.348
2.01563	1.05687					2.64	1.58037					8.36667	2.11559					6.00652	1.5221
2.01563	1.56711					2.64	0.98682					8.36667	1.36448					6.00652	1.10273
2.01563	1.0418					2.64	1.68844					8.36667	1.74243					6.00652	3.35388
2.01563	1.32883					2.64	0.91022					8.36667	1.10982					6.00652	1.04213
2.01563	0.99701					2.64	1.07987					8.36667	2.08627					6.00652	1.59382
2.01563	1.15358					2.64	1.84796					8.36667	1.85159					6.00652	1.46287
2.01563	0.96156					2.64	1.11185											6.00652	1.42744
2.01563	1.0816					2.64	1.10279											6.00652	1.3868
2.01563	1.34113					2.64	1.00854											6.00652	1.11138
2.93077	1.6653					2.64	1.02583											6.00652	1.1063
2.93077	2.71754					3.95294	1.00264											6.00652	2.87335
2.93077	0.97988					3.95294	1.20066											6.00652	1.35583
2.93077	1.04684					3.95294	1.05518											6.00652	1.25278
2.93077	1.696					3.95294	1.24651											6.00652	2.26186
2.93077	0.99581					3.95294	1.18512											6.00652	1.71
2.93077	1.10696					3.95294	1.90816											6.00652	1.13992
2.93077	1.4148					3.95294	2.24799											6.00652	1.79862
2.93077	1.04532					3.95294	1.0388											6.00652	1.26361
2.93077	1.12836					3.95294	1.15274											6.00652	2.67452
2.93077	1.28286					3.95294	1.19096											6.00652	2.01591
2.93077	1.37786					3.95294	1.94868											6.00652	2.84738
2.93077	1.07472					3.95294	1.47419											6.00652	1.52874
						3.95294	1.11451											9.64286	2.32068
						3.95294	1.04233											9.64286	2.78323
						3.95294	1.95554											9.64286	2.69246
						3.95294	1.06669											9.64286	1.42727
						3.95294	1.0191											9.64286	2.43192
						6.23	2.38993											9.64286	1.60404
						6.23	1.03835											9.64286	1.26711
						6.23	1.76002											9.64286	1.39348
						6.23	1.16348											9.64286	1.67171
						6.23	1.61636											9.64286	2.61557
						6.23	1.60888											9.64286	1.23837
						6.23	1.60101											9.64286	1.81327
						6.23	1.05053											9.64286	2.81344
						6.23	1.25491											9.64286	2.31713
						6.23	1.32528											9.64286	1.63653
						6.23	1.16248											9.64286	1.81914
						6.23	1.02398											9.64286	1.8747
						6.23	1.5645											9.64286	1.97878
						6.23	1.01809											9.64286	2.78869
						6.23	1.49877											9.64286	2.25409
																		9.64286	2.48677
