# Supplementary material for: Drosophila mechanical nociceptors preferentially sense localized poking
Source: eLife journal article supplement (doi:10.7554/elife.76574), 2022-10-06
Supplement: supp [file Figure 2-figure supplement 2_source data 1.xlsx]

## Sheet: Figure 2-figure supplement 2
30 μm probe stimuli				60 μm probe stimuli				100 μm probe stimuli				200 μm probe stimuli
P5 μm (MPa)	mean F/F0	F/F0 error (se)		P5 μm (MPa)	mean F/F0	F/F0 error (se)		P5 μm (MPa)	mean F/F0	F/F0 error (se)		P5 μm (MPa)	mean F/F0	F/F0 error (se)
0.88763	1.03838	0.02103		1.59	1.01703	0.01791		1.44	1.1427	0.05883		0.85	1.12164	0.0609
1.96412	1.07112	0.02628		2.06	1.11403	0.03656		1.82	1.38845	0.07118		1.39	1.19523	0.06617
2.74185	1.16522	0.0619		2.45	1.29645	0.05896		2.43	1.50047	0.09488		1.58	1.29335	0.05028
3.53673	1.4276	0.07793		3.05	1.57233	0.16146		3.01	1.56558	0.1325		2.26	1.41511	0.06586
				3.77	1.76422	0.11949
30 μm probe stimuli				60 μm probe stimuli				100 μm probe stimuli				200 μm probe stimuli
P10 μm (MPa)	mean F/F0	F/F0 error (se)		P10 μm (MPa)	mean F/F0	F/F0 error (se)		P10 μm (MPa)	mean F/F0	F/F0 error (se)		P10 μm (MPa)	mean F/F0	F/F0 error (se)
0.93056	1.07112	0.02628		1.2	1.01703	0.01791		1.34	1.1427	0.05883		0.81	1.12164	0.0609
1.93833	1.16522	0.0619		1.84	1.11403	0.03656		1.75	1.38845	0.07118		1.35	1.19523	0.06617
2.79504	1.4276	0.07793		2.27	1.29645	0.05896		2.35	1.50047	0.09488		1.55	1.29335	0.05028
				2.87	1.57233	0.16146		2.92	1.56558	0.1325		2.22	1.41511	0.06586
				3.59	1.76422	0.11949
				60 μm probe stimuli				100 μm probe stimuli				200 μm probe stimuli
				P15 μm (MPa)	mean F/F0	F/F0 error (se)		P15 μm (MPa)	mean F/F0	F/F0 error (se)		P15 μm (MPa)	mean F/F0	F/F0 error (se)
				1.4	1.11403	0.03656		1.17	1.1427	0.05883		0.75	1.12164	0.0609
				1.95	1.29645	0.05896		1.62	1.38845	0.07118		1.29	1.19523	0.06617
				2.55	1.57233	0.16146		2.2	1.50047	0.09488		1.49	1.29335	0.05028
				3.26	1.76422	0.11949		2.76	1.56558	0.1325		2.16	1.41511	0.06586
