# Supplementary material for: Drosophila mechanical nociceptors preferentially sense localized poking
Source: eLife journal article supplement (doi:10.7554/elife.76574), 2022-10-06
Supplement: supp [file Figure 2-figure supplement 3_source data 1.xlsx]

## Sheet: Figure 2-figure supplement 3
probe size (μm）	30	60	100	200			p-value of Kruskal-Wallis test for different nimodipine concentration
force (mN)	14.2355	14.1708	18.13	16.856			30 μm probe <-> 60 μm probe: 1
	15.5232	15.1559	15.582	14.308			30 μm probe <-> 100 μm probe: 1
	17.1725	16.366	14.994	15.974			30 μm probe <-> 200 μm probe: 1
	19.7176	19.012	15.876	18.4632			60 μm probe <-> 100 μm probe: 1
	18.5191	17.64	18.032	15.484			60 μm probe <-> 200 μm probe: 1
							100 μm probe <-> 200 μm probe: 1
