# Supplementary material for: Drosophila mechanical nociceptors preferentially sense localized poking
Source: eLife journal article supplement (doi:10.7554/elife.76574), 2022-10-06
Supplement: supp [file Figure 3-figure supplement 1_source data 1.xlsx]

## Sheet: Panel B
normalized Piezo fluorescence (A.U.)								normalized Ppk26 fluorescence (A.U.)
proximal position			distal position					proximal position			distal position
wt c4da	cti c4da	p value of t-test	wt c4da	cti c4da	p value of t-test			wt c4da	cti c4da	p value of t-test	wt c4da	cti c4da	p value of t-test
0.93431	0.62289	wt c4da <-> cti c4da: 0.441	0.71533	1.20294	wt c4da <-> cti c4da: 0.910			0.92646	1.1918	wt c4da <-> cti c4da: 0.316	0.90294	1.01837	wt c4da <-> cti c4da: 0.180
0.74142	0.45489		0.63752	0.76096				0.61081	1.33976		1.46924	1.3509
1.13844	0.51885		0.71285	1.10745				1.13281	0.65698		0.85273	1.32586
1.11748	0.62945		1.19504	0.97978				1.42393	1.24167		0.8545	0.9391
1.04118	0.65771		0.82934	1.21226				0.74292	0.73713		1.0856	1.2688
1.11071	0.98171		0.98454	1.0689				0.90806	0.87423		1.1445	1.04014
0.97872	0.93021		1.05954	0.98461				1.85543	1.55396		1.13198	1.1791
0.97974	1.17699		0.99922	0.79448				0.58236	1.11938		1.44036	1.50427
0.97869	1.1587		1.23883	1.20336				0.56898	0.7167		0.93909	1.4357
1.00464	0.90641		0.71334	1.27597				0.44395	1.24886		1.02768	0.78245
1.0041	0.83654		0.87959	1.39702				0.94219	0.9252		0.91372	0.62844
0.98191	0.97986		0.68614	1.14286				0.48766	0.73231		0.77574	1.30722
1.40086	1.0487		0.66932	0.99365				0.8602	0.97104		1.1412	1.09827
0.8051	1.09398		0.96351	0.8556				1.42816	1.4034		0.84963	1.09498
0.83625	1.03394		1.45698	1.00986				0.6516	1.07257		0.82455	1.15251
0.99267	1.28287		1.20248	0.65714				1.06798	1.99891		0.95368	1.08883
0.95379	1.16732		0.87186	0.56432				1.20574	1.62034		0.91359	0.80447
0.85267	1.53755		1.2448	0.69568				2.35757	0.70964		0.93338	0.78143
1.12129	0.9374		1.6561					0.8472	1.37144		0.84589
0.99613								0.86002
1.11722								0.87972
0.9127								1.21627

## Sheet: Panel D
normalized Jupiter fluorescence (A.U.)								normalized Lifeact fluorescence (A.U.)
proximal position			distal position					proximal position			distal position
wt c4da	cti c4da	p value of t-test	wt c4da	cti c4da	p value of t-test			wt c4da	cti c4da	p value of t-test	wt c4da	cti c4da	p value of t-test
1.83852	1.09841	wt c4da <-> cti c4da: 0.335	0.94085	0.81986	wt c4da <-> cti c4da: 0.835			1.24078	1.39113	wt c4da <-> cti c4da: 0.124	0.61252	1.71276	wt c4da <-> cti c4da: 0.094
1.2409	1.12033		0.54794	1.26592				0.97102	1.58973		0.58101	0.73394
1.07276	1.21108		0.76356	0.86334				0.99785	1.24897		0.68714	1.22548
0.87255	1.12633		0.76753	1.24894				1.29469	0.97641		1.04751	1.03109
0.7468	1.06229		1.29303	1.12075				1.33559	0.81719		0.909	0.60956
0.84873	1.21859		1.27239	1.14872				0.99512	0.67643		0.79775	1.52025
0.72539	1.92683		1.75964	1.12366				0.83402	1.26144		0.92868	0.77504
1.06132	1.39703		0.71679	1.09209				0.77168	0.96738		0.43195	1.33509
0.84361	0.62274		0.73003	0.57005				0.68958	1.13676		0.80413	0.95507
0.82398	0.8051		1.20879	1.03625				1.02209	0.94534		1.63055	1.22957
0.89898	0.81771							1.36146	0.94754		1.02335	1.22483
1.15581								0.85423	1.84287		1.03955	1.38468
1.06878								1.02617	1.40455		0.76812	1.3166
0.80304								0.74174			1.62231	1.41351
								0.84723			0.96685	1.08256
								1.01715			1.82388	1.85602
											1.07549
											1.24112
