# Supplementary material for: Drosophila mechanical nociceptors preferentially sense localized poking
Source: eLife journal article supplement (doi:10.7554/elife.76574), 2022-10-06
Supplement: supp [file Figure 4-figure supplement 1_source data 1.xlsx]

## Sheet: Panel B
60 μm probe with 1 MPa cuticle
r (μm)	normalized TL (kPa)	normalized PP (kPa)
0.578525	0.08815	1
1.73727	0.07737	0.99325
2.89991	0.17706	0.9881
4.06461	0.21005	0.98194
5.23115	0.28574	0.97212
6.39722	0.32771	0.95813
7.56128	0.40029	0.9365
8.72164	0.4449	0.91463
9.87717	0.52543	0.8877
11.0272	0.55455	0.86015
12.1693	0.6528	0.82445
13.303	0.66543	0.79232
14.4277	0.7638	0.7481
15.5427	0.78775	0.70888
16.6462	0.86332	0.65904
17.7385	0.89537	0.61197
18.819	0.94443	0.55738
19.89	0.97571	0.50226
20.9491	1	0.44451
21.9969	0.99768	0.38682
23.0384	0.98489	0.32609
24.0747	0.94708	0.27132
25.1085	0.89383	0.21788
26.1424	0.82089	0.17139
27.1795	0.73551	0.13021
28.2237	0.64631	0.09803
29.2763	0.55942	0.07294
30.338	0.47732	0.05389
31.4114	0.40394	0.03975
32.4965	0.34307	0.03012
33.5924	0.28957	0.02279
34.6999	0.24502	0.01784
35.8186	0.20901	0.0145
36.9479	0.17889	0.01202
38.0874	0.15443	0.0103
39.2368	0.13396	0.00891
40.3957	0.11701	0.00786
41.5637	0.10278	0.00705
42.7405	0.09104	0.00641
43.9258	0.08061	0.00574
45.1195	0.07183	0.00519
46.3212	0.06413	0.00467
47.5308	0.05729	0.00422
48.7482	0.05148	0.00385
49.9734	0.04621	0.00344
51.206	0.04152	0.00307
52.4462	0.03738	0.00278
53.6937	0.03382	0.00253
54.9485	0.03044	0.00223
56.2107	0.02735	0.00198
57.4801	0.0247	0.00179
58.7567	0.02238	0.00162
60.0404	0.02015	0.00144

## Sheet: Panel C
		only PP		only TL		PP + TL
probe size	Cd (μm)	average responding possibility	possiblility error (std)	average responding possibility	possiblility error (std)	average responding possibility	possiblility error (std)
60 μm	20	0.959	0.027	0.978	0.006	0.997	0.02
	200	0.345	0.146	0.893	0.062	0.918	0.049
	400	0	0	0.437	0.188	0.675	0.153
