# Supplementary material for: Drosophila mechanical nociceptors preferentially sense localized poking
Source: eLife journal article supplement (doi:10.7554/elife.76574), 2022-10-06
Supplement: supp [file Figure 6-figure supplement 1_source data 1.xlsx]

## Sheet: Figure 6-figure supplement 1
wt c4da	wt c4da in 1% DMSO	wt c4da incubated with 2.5 μM nimodipine	wt c4da incubated with 5.0 μM nimodipine	scrambled RNAi c4da	Ca-α1Di c4da	Ca-α1Dx10/AR66 c4da	p value of U-test	p-value of Kruskal-Wallis test for different nimodipine concentration
1.44158	1.57271	1.55156	1.26666	1.75958	1.13682	1.16168	wt c4da <-> wt c4da in 1% DMSO: 0.348	wt c4da in 1% DMSO <-> wt c4da incubated with 2.5 μM nimodipine: 1
1.89208	1.97286	1.53433	1.11694	1.71718	0.96988	1.43349	wt c4da <-> scrambled RNAi c4da: 0.838	wt c4da in 1% DMSO <-> wt c4da incubated with 5.0 μM nimodipine: 0.0034
1.78873	1.86421	1.47205	1.11561	1.40449	0.91555	1.30819	wt c4da <-> Ca-α1Di c4da: 5.8284E-4	wt c4da incubated with 2.5 μM nimodipine <-> wt c4da incubated with 5.0 μM nimodipine: 0.038
1.47205	1.40178	1.30776	1.25076	1.75296	1.0401	1.00474	wt c4da <-> Ca-α1DX10/AR66 c4da: 0.041
1.54758	1.47068	1.46411	0.96191	1.37268	1.10105	1.21028
1.29715	2.13716	1.48265	1.03081	0.9765	1.00167	1.05574
1.16465	1.46274	1.03351	1.05201	1.03613	1.0136	1.05136
1.23753	1.25073	1.05732	1.02948	1.33293	0.96193	1.02798
1.27993	0.98175	1.3369	1.01888	1.55654	0.93013	1.22972
1.00698		1.14346	1.14343		0.95
			0.98046
			1.34749
