# Supplementary material for: Drosophila mechanical nociceptors preferentially sense localized poking
Source: eLife journal article supplement (doi:10.7554/elife.76574), 2022-10-06
Supplement: supp [file Figure 6-figure supplement 2_source data 1_numerical data.xlsx]

## Sheet: Panel A
	signal for Ca-α1D primer		signal for rp49 primer		normalized signal（A.U.）
trial number	control group	Ca-α1Di group	control group	Ca-α1Di group	control group	Ca-α1Di group	p value of t test
1	75.232	63.214	126.258	157.968	0.59586	0.40017	normalized control group <-> normalized Ca-α1Di group: 0.02203
2	74.424	58.932	119.052	158.006	0.62514	0.37297
3	70.451	58.706	137.806	161.791	0.51123	0.36285

## Sheet: Panel C
control group	Ca-α1DMB06807 group
0.98131	1.03037		p value of t test
0.88318	0.91121		0.121
0.87617	0.93925
0.95327	0.99533
0.92523	0.96028
0.90421	1.00935
1.00234	0.9743
0.83411	1.21262
0.95327	0.91121
1.51402	0.91822
1.07944	0.92523
1.21262	1.00234
1.00234	0.92523
0.96028	0.88318
0.86916	0.96729
1.02336	1.08645
0.94626	1.03738
1.14953	0.93925
1.45794	0.90421
0.98832	0.88318
0.93224	0.87617
0.86916	0.87617
0.95327	0.8271
0.8972	0.86215
0.87617	0.95327
0.88318	1.10748
0.89019	0.98832
1.00234	0.82009
0.9743	0.84112
1.20561	0.8271

## Sheet: Panel D
control group	promoter-mcherry-Ca-α1D group
0.91371	1.07614		p value of t test
0.8731	0.90017		0.644
0.86633	1.00169
0.85956	0.91371
1.14382	1.00846
1.022	1.13706
1.17766	1.08968
1.05584	0.99492
1.00169	1.22504
1.08291	0.93401
1.09645	1.02876
0.90694	0.93401

## Sheet: Panel E
control group	mcherry-Ca-α1D group
0.90086	0.98338		p value of t test
0.95587	1.10029		0.465
0.95587	0.99713
0.90774	1.18281
0.9765	1.01089
1.07278	1.0384
0.98338	1.05903
1.01777	1.00401
0.90086	0.98338
1.1553	1.07278
1.23095	0.92149
0.94212	0.96963
