# Supplementary material for: Drosophila mechanical nociceptors preferentially sense localized poking
Source: eLife journal article supplement (doi:10.7554/elife.76574), 2022-10-06
Supplement: supp [file Figure1_source data 1.xlsx]

## Sheet: Figure.1B
gravity is 9.8015 N/kg in Beijing
drop (mL)	force (mN)	average Δsensor readout (mV)	1st trial Δsensor readout (mV)	2nd trial Δsensor readout (mV)	3rd trial Δsensor readout (mV)
0	0	0	0	0	0
0.1	0.98	0.7	0.8	0.7	0.7
0.2	1.96	1.4	1.5	1.4	1.3
0.3	2.94	2	2	2	2
0.4	3.92	2.7	2.6	2.7	2.6
0.5	4.9	3.3	3.3	3.3	3.3
1	9.8	6.5	6.5	6.6	6.4
2	19.6	12.9	13	12.8	13
3	29.4	19.4	19.4	19.4	19.4
4	39.2	25.8	25.9	26	25.8
5	49	32.3	32.1	32.5	32.3

## Sheet: Figure.1H
piezo voltage (V)	displacement of piezo free end (μm)	bending of force sensor arm (μm)
5	7.09	1.76
10	13.09	2.58
15	20.76	3.41
20	26.39	3.89
25	33.38	5.01
30	38.59	5.37

## Sheet: Figure.1I
deformation of the fillet (μm)	maxium force (mV)	minium force (mV)	deformation of the fillet tested (μm)	average force tested (mN)	average force tested error (se) (mN)	average force tested error (std) (mN)
0	0	0	6.6	0.45	0.07706	0.21794
1	0.03697	0.01568	13.2	1.51875	0.07983	0.28784
2	0.10457	0.04434	19.3	2.64	0.13404	0.55266
3	0.19211	0.08146	24	3.95294	0.19127	0.74077
4	0.29577	0.12542
5	0.41335	0.17528
6	0.54337	0.23041
7	0.68472	0.29035
8	0.83657	0.35474
9	0.99823	0.42329
10	1.16914	0.49577
11	1.34883	0.57196
12	1.53687	0.6517
13	1.73293	0.73484
14	1.93668	0.82124
15	2.24785	0.91078
16	2.46617	1.00336
17	2.79143	1.09888
18	2.92342	1.19725
19	3.26194	1.2984
20	3.50683	1.40224
21	3.75791	1.50871
22	4.01505	1.61775
23	4.2781	1.72929
24	4.54694	1.84329
25	4.82143	1.95969
26	5.10147	2.07844
27	5.38695	2.19949
28	5.67777	2.32281
29	5.97382	2.44835
30	6.27503	2.57608
