# Supplementary material for: Drosophila mechanical nociceptors preferentially sense localized poking
Source: eLife journal article supplement (doi:10.7554/elife.76574), 2022-10-06
Supplement: supp [file Figure2_source data 1.xlsx]

## Sheet: Figure. 2B
time (sec)	F/F0 for 30 μm probe stimulus	F/F0 for 60 μm probe stimulus
0	0.9985	1.00048
0.13	0.97738	1.00317
0.26	0.97711	0.95672
0.39	0.99208	0.9884
0.52	0.95481	1.00385
0.65	0.97688	0.98329
0.78	0.98312	0.96751
0.91	0.93466	0.98586
1.04	0.97302	0.97433
1.17	0.96127	0.99286
1.3	1.03647	0.98273
1.43	1.03542	1.01169
1.56	1.0043	0.98984
1.69	0.99249	0.96246
1.82	0.97599	0.97851
1.95	0.97476	1.0032
2.08	0.96641	0.99504
2.21	0.98913	0.97409
2.34	0.98328	0.96972
2.47	0.97883	0.97239
2.6	0.98277	0.98515
2.73	0.9525	0.97788
2.86	0.9934	0.98509
2.99	1.01026	0.99692
3.12	0.98113	0.96599
3.25	0.98365	0.93007
3.38	0.99243	0.98347
3.51	1.02176	0.99973
3.64	1.00392	0.96686
3.77	1.00309	0.98347
3.9	1.01984	0.96922
4.03	1.02371	0.96596
4.16	0.99805	0.98867
4.29	1.00712	0.99474
4.42	0.99559	0.9882
4.55	1.0093	0.97962
4.68	1.01972	0.97615
4.81	1.01357	0.95825
4.94	0.98835	0.98604
5.07	0.99706	0.99307
5.2	0.9952	0.96984
5.33	1.01794	0.95302
5.46	0.99748	0.97881
5.59	0.99358	0.9815
5.72	1.01214	0.99088
5.85	0.98663	0.9711
5.98	1.00131	0.97986
6.11	1.00431	0.98389
6.24	0.9771	0.96751
6.37	0.99114	0.97322
6.5	0.97501	0.98542
6.63	0.99965	0.96312
6.76	0.97518	0.98168
6.89	0.98539	1.00556
7.02	0.99063	0.98781
7.15	0.9879	1.00123
7.28	0.9955	0.97762
7.41	0.96714	0.96925
7.54	0.99255	0.98843
7.67	0.97344	0.97782
7.8	0.98845	0.98849
7.93	0.96613	0.98249
8.06	0.97793	0.98894
8.19	0.98376	0.97167
8.32	0.97509	0.972
8.45	1.00117	0.9841
8.58	0.97618	0.96969
8.71	0.97496	1.00708
8.84	0.96847	0.96306
8.97	0.97905	0.97785
9.1	0.96154	0.99755
9.23	0.96393	0.96145
9.36	0.35588	0.99306
9.49	0.17113	0.96565
9.62	0.16853	0.97004
9.75	0.165	0.95985
9.88	0.16642	0.99061
10.01	0.16331	1.0064
10.14	0.16099	0.98882
10.27	0.15813	0.99643
10.4	0.16393	0.81215
10.53	0.16289	0.82511
10.66	0.16219	0.83694
10.79	0.15973	0.85288
10.92	0.16113	0.86013
11.05	0.39065	0.89963
11.18	0.64421	1.13143
11.31	0.74179	1.09167
11.44	0.8414	1.08226
11.57	0.92583	1.10849
11.7	0.96132	1.12727
11.83	1.00682	1.13452
11.96	1.00843	1.14993
12.09	1.04405	1.15995
12.22	1.06304	1.17589
12.35	1.0898	1.18222
12.48	1.11131	1.2343
12.61	1.14557	1.22127
12.74	1.14116	1.21671
12.87	1.15815	1.21394
13	1.17179	1.22104
13.13	1.18265	1.19915
13.26	1.20597	1.20177
13.39	1.21306	1.2106
13.52	1.21152	1.25992
13.65	1.25366	1.22114
13.78	1.22805	1.24777
13.91	1.2475	1.2535
14.04	1.24825	1.27136
14.17	1.2634	1.27552
14.3	1.25204	1.2446
14.43	1.27872	1.27565
14.56	1.2884	1.29311
14.69	1.3245	1.29558
14.82	1.30817	1.31387
14.95	1.33741	1.29336
15.08	1.34764	1.31935
15.21	1.34321	1.32265
15.34	1.34856	1.3484
15.47	1.34629	1.34661
15.6	1.35828	1.34482
15.73	1.39168	1.35121
15.86	1.38001	1.35145
15.99	1.3843	1.33992
16.12	1.37796	1.34633
16.25	1.39141	1.38766
16.38	1.38319	1.36023
16.51	1.39682	1.35799
16.64	1.39522	1.35784
16.77	1.38874	1.41026
16.9	1.40253	1.3614
17.03	1.40849	1.40081
17.16	1.40091	1.38218
17.29	1.42102	1.3776
17.42	1.41658	1.41045
17.55	1.41498	1.38911
17.68	1.44077	1.39712
17.81	1.41606	1.42149
17.94	1.43124	1.39623
18.07	1.44125	1.41563
18.2	1.45017	1.43948
18.33	1.43045	1.4123
18.46	1.45385	1.42891
18.59	1.44494	1.42373
18.72	1.42636	1.4128
18.85	1.41963	1.40092
18.98	1.45456	1.44939
19.11	1.44176	1.42034
19.24	1.4365	1.41401
19.37	1.47342	1.43351
19.5	1.45582	1.45777
19.63	1.4688	1.45632
19.76	1.47536	1.45231
19.89	1.45976	1.44125
20.02	1.44743	1.44034
20.15	1.47102	1.42914
20.28	1.44444	1.47444
20.41	1.44211	1.466
20.54	1.45502	1.4777
20.67	1.44059	1.46095
20.8	1.4854	1.47098
20.93	1.45035	1.47305
21.06	1.47732	1.45915
21.19	1.42987	1.46339
21.32	1.44502	1.45239
21.45	1.46302	1.50394
21.58	1.45601	1.51524
21.71	1.45975	1.45647
21.84	1.45687	1.50457
21.97	1.44598	1.47725
22.1	1.46081	1.48098
22.23	1.44529	1.49449
22.36	1.44934	1.49475
22.49	1.44399	1.50888
22.62	1.44375	1.5176
22.75	1.44555	1.45909
22.88	1.4542	1.48392
23.01	1.43138	1.51494
23.14	1.44039	1.48751
23.27	1.47078	1.49416
23.4	1.43864	1.51489
23.53	1.43752	1.4573
23.66	1.43955	1.48002
23.79	1.44734	1.50394
23.92	1.45502	1.51965
24.05	1.45743	1.52007
24.18	1.45342	1.52432
24.31	1.46118	1.50986
24.44	1.42943	1.4655
24.57	1.43915	1.54333
24.7	1.42687	1.45056
24.83	1.44989	1.45293
24.96	1.44768	1.4914
25.09	1.44481	1.49132
25.22	1.45006	1.49754
25.35	1.43586	1.526
25.48	1.44912	1.51775
25.61	1.4191	1.48151
25.74	1.43522	1.48531
25.87	1.42626	1.50801
26	1.41922	1.50339
26.13	1.42335	1.46811
26.26	1.42729	1.49581
26.39	1.44527	1.4949
26.52	1.41703	1.48787
26.65	1.42936	1.54484
26.78	1.39238	1.48079
26.91	1.41707	1.51888
27.04	1.4132	1.49345
27.17	1.40992	1.4989
27.3	1.41785	1.51082
27.43	1.40796	1.51257
27.56	1.4354	1.46009
27.69	1.41594	1.48575
27.82	1.40086	1.49228
27.95	1.39088	1.50142
28.08	1.3934	1.49554
28.21	1.38863	1.524
28.34	1.40531	1.53836
28.47	1.39624	1.48599
28.6	1.40933	1.48384
28.73	1.41698	1.49622
28.86	1.41686	1.50072
28.99	1.38955	1.53128
29.12	1.4043	1.5154
29.25	1.39558	1.4446
29.38	1.40607	1.47567
29.51	1.4024	1.44536
29.64	1.39414	1.48902
29.77	1.38987	1.48584
29.9	1.398	1.4342
30.03	1.40664	1.47759
30.16	1.4038	1.47531
30.29	1.41054	1.47324
30.42	1.3875	1.47702
30.55	1.38658	1.48744
30.68	1.40066	1.46373
30.81	1.38111	1.44971
30.94	1.37217	1.41945
31.07	1.37031	1.47341
31.2	1.39603	1.4832
31.33	1.38982	1.47388
31.46	1.38067	1.45707
31.59	1.37426	1.52493
31.72	1.39849	1.49358
31.85	1.36797	1.44699
31.98	1.38577	1.43349
32.11	1.36422	1.4275
32.24	1.3605	1.41115
32.37	1.36132	1.46142
32.5	1.36121	1.42405
32.63	1.33963	1.45384
32.76	1.36866	1.4486
32.89	1.37286	1.43908
33.02	1.377	1.41932
33.15	1.34316	1.42827
33.28	1.35364	1.4077
33.41	1.36164	1.41593
33.54	1.33749	1.42859
33.67	1.36297	1.41288
33.8	1.36578	1.41898
33.93	1.37188	1.47295
34.06	1.34497	1.39651
34.19	1.35301	1.43726
34.32	1.3516	1.42202
34.45	1.341	1.42106
34.58	1.35706	1.4246
34.71	1.36232	1.41688
34.84	1.34248	1.40405
34.97	1.34569	1.42123
35.1	1.34747	1.40239
35.23	1.36046	1.39453
35.36	1.31419	1.41179
35.49	1.33543	1.44332
35.62	1.35215	1.42995
35.75	1.34596	1.43822
35.88	1.32495	1.433
36.01	1.35201	1.42094
36.14	1.33547	1.40497
36.27	1.33398	1.39363
36.4	1.33741	1.39005
36.53	1.34213	1.40424
36.66	1.35066	1.41234
36.79	1.33143	1.38236
36.92	1.33046	1.40557
37.05	1.3222	1.42878
37.18	1.31223	1.40005
37.31	1.34729	1.40672
37.44	1.34354	1.44526
37.57	1.33254	1.37541
37.7	1.33312	1.37381
37.83	1.31895	1.42305
37.96	1.33322	1.40785
38.09	1.32779	1.38202
38.22	1.3189	1.38591
38.35	1.31978	1.37745
38.48	1.31316	1.38832
38.61	1.32783	1.37272
38.74	1.32081	1.36652
38.87	1.33288	1.35392
39	1.32845	1.37149
39.13	1.30881	1.35554
39.26	1.33729	1.38236
39.39	1.30734	1.37566
39.52	1.32493	1.35392
39.65	1.31675	1.35317
39.78	1.31528	1.38621
39.91	1.31055	1.36296
40.04	1.31688	1.36733
40.17	1.29617	1.33661
40.3	1.30227	1.39303
40.43	1.29058	1.34774
40.56	1.32477	1.32096
40.69	1.30201	1.3507
40.82	1.296	1.36309
40.95	1.25896	1.35292
41.08	1.29493	1.34727
41.21	1.30054	1.35936
41.34	1.29399	1.3727
41.47	1.26905	1.33222
41.6	1.28534	1.34305
41.73	1.26561	1.33551
41.86	1.28129	1.34047
41.99	1.29319	1.33683
42.12	1.27225	1.33122
42.25	1.25629	1.37474
42.38	1.26247	1.33802
42.51	1.25548	1.33418
42.64	1.24661	1.32559
42.77	1.27725	1.32095
42.9	1.25707	1.31837
43.03	1.24934	1.3293
43.16	1.25038	1.29131
43.29	1.23641	1.32062
43.42	1.24446	1.3368
43.55	1.24754	1.31602
43.68	1.22847	1.32393
43.81	1.25043	1.29452
43.94	1.23323	1.33173
44.07	1.25328	1.34036
44.2	1.25448	1.34162
44.33	1.24186	1.30441
44.46	1.24126	1.34119
44.59	1.2375	1.31538
44.72	1.25595	1.30671
44.85	1.25214	1.31184
44.98	1.24258	1.32165
45.11	1.22687	1.3105
45.24	1.23653	1.31012
45.37	1.24498	1.30779
45.5	1.23524	1.32666
45.63	1.22023	1.30978
45.76	1.22826	1.31664
45.89	1.21861	1.28595
46.02	1.23422	1.28356
46.15	1.23975	1.32593
46.28	1.21767	1.32713
46.41	1.22372	1.27584
46.54	1.22266	1.25374
46.67	1.22421	1.28533
46.8	1.23243	1.26077
46.93	1.21172	1.31231
47.06	1.2248	1.32372
47.19	1.22151	1.27853
47.32	1.21481	1.27582
47.45	1.21284	1.30057
47.58	1.22551	1.305
47.71	1.20676	1.24621
47.84	1.21853	1.27983
47.97	1.20871	1.28104
48.1	1.19463	1.27186
48.23	1.2117	1.28196
48.36	1.18706	1.26945
48.49	1.20533	1.2804
48.62	1.1837	1.24813
48.75	1.19627	1.26832
48.88	1.21811	1.29389
49.01	1.18375	1.24868
49.14	1.19134	1.26557
49.27	1.19128	1.27719
49.4	1.19763	1.27695
49.53	1.18647	1.2761
49.66	1.18139	1.25391
49.79	1.18792	1.2502
49.92	1.18226	1.25566
50.05	1.20282	1.26173
50.18	1.19345	1.22466
50.31	1.2058	1.2713
50.44	1.17366	1.24067
50.57	1.20809	1.23878
50.7	1.16959	1.22782
50.83	1.17245	1.24837
50.96	1.18247	1.24474
51.09	1.17787	1.22377
51.22	1.1949	1.20533
51.35	1.18459	1.20838
51.48	1.1813	1.23811
51.61	1.17157	1.26811
51.74	1.15567	1.23831
51.87	1.15723	1.17645
52	1.17673	1.20103
52.13	1.15554	1.20759
52.26	1.16374	1.2275
52.39	1.14539	1.21996
52.52	1.16354	1.23862
52.65	1.16358	1.22873
52.78	1.16571	1.23713
52.91	1.15231	1.22025
53.04	1.15834	1.22671
53.17	1.16043	1.25028
53.3	1.14686	1.23556
53.43	1.14976	1.20239
53.56	1.1589	1.20714
53.69	1.15463	1.21671
53.82	1.18234	1.19663
53.95	1.16429	1.19491
54.08	1.15393	1.18902
54.21	1.16536	1.20348
54.34	1.13852	1.22217
54.47	1.13486	1.19706
54.6	1.15357	1.2229
54.73	1.14438	1.20405
54.86	1.1334	1.20686
54.99	1.12906	1.20444
55.12	1.14191	1.22044
55.25	1.12213	1.20394
55.38	1.1169	1.20381
55.51	1.12782	1.14874
55.64	1.14662	1.19697
55.77	1.13232	1.17429
55.9	1.12007	1.20068
56.03	1.12329	1.18056
56.16	1.10934	1.15162
56.29	1.10875	1.18461
56.42	1.1097	1.19719
56.55	1.11257	1.22138
56.68	1.1181	1.19893
56.81	1.11791	1.19474
56.94	1.11639	1.17489
57.07	1.09132	1.20723
57.2	1.11619	1.1566
57.33	1.09523	1.16843
57.46	1.10432	1.16598
57.59	1.10059	1.16553
57.72	1.10092	1.1453
57.85	1.09735	1.21699
57.98	1.10098	1.19274
58.11	1.09562	1.17129
58.24	1.09387	1.13269
58.37	1.10502	1.1575
58.5	1.10039	1.17272
58.63	1.1027	1.1503
58.76	1.08467	1.15831
58.89	1.08907	1.1683
59.02	1.10242	1.16946
59.15	1.12071	1.18713
59.28	1.11496	1.14675
59.41	1.08587	1.16718
59.54	1.08986	1.16946
59.67	1.07566	1.17112
59.8	1.08141	1.18758
59.93	1.08349	1.13631
60.06	1.07574	1.18276
60.19	1.07637	1.16332
60.32	1.0744	1.15884
60.45	1.07622	1.14185
60.58	1.09071	1.16583
60.71	1.09838	1.15341
60.84	1.08457	1.13523
60.97	1.08822	1.15253
61.1	1.09107	1.15577
61.23	1.09345	1.1669
61.36	1.07165	1.14725
61.49	1.08594	1.132
61.62	1.06861	1.16114
61.75	1.08052	1.11764
61.88	1.05097	1.12629
62.01	1.0646	1.15008
62.14	1.05927	1.10549
62.27	1.06138	1.12493
62.4	1.05443	1.11125
62.53	1.04246	1.11596
62.66	1.0738	1.1115
62.79	1.06117	1.12199
62.92	1.07077	1.1238
63.05	1.05126	1.11621
63.18	1.06309	1.14567
63.31	1.0505	1.11952
63.44	1.05959	1.10391
63.57	1.05269	1.13593
63.7	1.0587	1.11909
63.83	1.05768	1.13527
63.96	1.07387	1.11421
64.09	1.04619	1.10862
64.22	1.04592	1.14674
64.35	1.05032	1.12065
64.48	1.0719	1.10208
64.61	1.03979	1.12314
64.74	1.04578	1.10018
64.87	1.05843	1.10445
65	1.03986	1.11401
65.13	1.0403	1.11204
65.26	1.0712	1.08516
65.39	1.05574	1.11832
65.52	1.06074	1.12081
65.65	1.03683	1.09745
65.78	1.03209	1.07224
65.91	1.03883	1.12633
66.04	1.04231	1.06872
66.17	1.05793	1.11756
66.3	1.04091	1.10246
66.43	1.03749	1.08707
66.56	1.03531	1.10709
66.69	1.03186	1.09773
66.82	1.02759	1.09818
66.95	1.0445	1.0852
67.08	1.02783	1.09138
67.21	1.02227	1.08072
67.34	1.01226	1.09172
67.47	1.02949	1.07829
67.6	1.03382	1.10464
67.73	1.01706	1.08577
67.86	1.02769	1.08179
67.99	1.00738	1.10421
68.12	1.00379	1.09016
68.25	1.01179	1.09078
68.38	1.00207	1.08189
68.51	1.02122	1.08703
68.64	1.02262	1.08974
68.77	1.01286	1.06964
68.9	1.01888	1.11888
69.03	1.02082	1.10438
69.16	1.01992	1.05864
69.29	1.02092	1.08174
69.42	1.01747	1.08522
69.55	1.01296	1.09374
69.68	1.00755	1.08963
69.81	0.99999	1.09643
69.94	0.99771	1.08688
70.07	1.01285	1.07552
70.2	1.01204	1.08479
70.33	1.00813	1.08693
70.46	1.00298	1.09688
70.59	1.01605	1.07846
70.72	1.00325	1.05986
70.85	1.01564	1.08733
70.98	1.01048	1.05634
71.11	1.00205	1.09668
71.24	0.99679	1.06878
71.37	0.99646	1.07428
71.5	1.00163	1.06942
71.63		1.07648
71.76		1.05972
71.89		1.07637
72.02		1.03976
72.15		1.0505
72.28		1.05527
72.41		1.05533
72.54		1.06218
72.67		1.05395
72.8		1.03831
72.93		1.04779
73.06		1.07392
73.19		1.05472
73.32		1.04984
73.45		1.07748
73.58		1.06554
73.71		1.05518
73.84		1.05794
73.97		1.06808
74.1		1.0357
74.23		1.03298
74.36		1.0558
74.49		1.05306
74.62		1.05514
74.75		1.03945
74.88		1.04135
75.01		1.05297
75.14		1.03008
75.27		1.05329
75.4		1.02692
75.53		1.0528
75.66		1.02986
75.79		1.03331
75.92		1.04998
76.05		1.05391
76.18		1.03374
76.31		1.03607
76.44		1.03526
76.57		1.06337
76.7		1.03489
76.83		1.04244
76.96		1.04664
77.09		1.04636
77.22		1.06834
77.35		1.04075
77.48		1.0389
77.61		1.04937
77.74		1.02046
77.87		1.0386
78		1.02153
78.13		1.05911
78.26		1.04374
78.39		1.03954
78.52		1.05406
78.65		1.05325
78.78		1.02202
78.91		1.0305
79.04		1.0373
79.17		0.99361
79.3		1.03487
79.43		1.03468
79.56		1.02019
79.69		1.03099
79.82		1.01147
79.95		1.01677
80.08		1.00486
80.21		1.02342
80.34		1.03898
80.47		1.0421
80.6		1.03624
80.73		1.02553
80.86		1.01723
80.99		1.02486
81.12		1.01906
81.25		1.00358
81.38		1.01767
81.51		1.02149
81.64		1.03101
81.77		1.01592
81.9		1.00819
82.03		1.02517
82.16		1.00542
82.29		1.03472
82.42		1.0195
82.55		1.02568
82.68		1.01556
82.81		1.00678

## Sheet: Figure. 2C
30 μm probe data						60 μm probe data
scatter data		average data				scatter data		average data
force (mN)	F/F0	force (mN)	mean F/F0	F/F0 error (se)		force (mN)	F/F0	force (mN)	mean F/F0	F/F0 error (se)
0.13731	0.95849	0.13731	1.13856	0.15596		0.61914	0.97526	0.61914	0.99035	0.00945
0.13731	0.98478	0.37	1.3439	0.14974		0.61914	0.95482	1.53395	1.12361	0.03628
0.13731	0.9443	0.75	1.40481	0.16001		0.61914	0.97895	2.68043	1.32752	0.06573
0.13731	0.99878	1.25455	1.82683	0.18392		0.61914	0.94804	4.13333	1.65869	0.09462
0.13731	2.92724	1.875	2.09265	0.22286		0.61914	1.04804	6.13	1.84316	0.10538
0.13731	0.98401	2.86667	1.90909	0.18944		0.61914	1.03482	7.96	1.78728	0.07181
0.13731	1.01991					0.61914	0.99242	11.58	1.80363	0.09526
0.13731	0.90364					0.61914	1.01853
0.13731	1.04045					0.61914	1.01156
0.13731	1.04611					0.61914	1.01379
0.13731	1.10797					0.61914	0.98372
0.13731	0.92058					0.61914	0.95098
0.13731	0.96506					0.61914	0.9148
0.37	1.00737					0.61914	0.96286
0.37	1.02581					0.61914	1.04409
0.37	1.0323					0.61914	0.95573
0.37	0.98813					0.61914	1.08834
0.37	1.03085					0.61914	1.04799
0.37	1.02304					0.61914	0.98212
0.37	0.92526					0.61914	0.85453
0.37	1.64014					0.61914	0.99093
0.37	1.0459					0.61914	0.98861
0.37	2.6809					0.61914	1.01634
0.37	1.98847					0.61914	1.02064
0.37	2.35654					0.61914	1.03714
0.37	1.01897					0.61914	0.9417
0.37	1.31308					0.61914	0.98263
0.37	1.08179					1.53395	1.0819
0.75	1.06149					1.53395	0.9923
0.75	0.95037					1.53395	1.22858
0.75	1.514					1.53395	1.07909
0.75	1.07476					1.53395	1.26055
0.75	1.12883					1.53395	1.19907
0.75	1.23429					1.53395	1.12824
0.75	1.32594					1.53395	1.04809
0.75	1.38792					1.53395	1.08737
0.75	1.21849					1.53395	0.91697
0.75	2.07292					1.53395	1.11815
0.75	1.14315					1.53395	1.0812
0.75	2.99215					1.53395	1.02997
0.75	1.15816					1.53395	0.99669
1.25455	1.8072					1.53395	1.10865
1.25455	1.21759					1.53395	1.8816
1.25455	1.45174					1.53395	1
1.25455	2.53189					1.53395	1.33028
1.25455	1.2762					1.53395	0.92501
1.25455	2.06387					1.53395	0.99822
1.25455	2.8102					1.53395	1.17004
1.25455	1.5438					1.53395	1
1.875	2.65231					1.53395	1.15424
1.875	2.41914					1.53395	1.1973
1.875	2.773					1.53395	1.01956
1.875	1.55954					1.53395	1.02442
1.875	1.31784					1.53395	1.28
1.875	1.37014					2.68043	1.27724
1.875	3.22788					2.68043	1.26158
1.875	2.5761					2.68043	1.00496
1.875	2.23806					2.68043	1.13204
1.875	1.62892					2.68043	1.89131
1.875	1.29814					2.68043	1.71783
2.86667	1.35237					2.68043	1.19312
2.86667	1.62562					2.68043	1.20615
2.86667	1.97086					2.68043	1.11144
2.86667	2.65344					2.68043	1.00922
2.86667	1.60946					2.68043	1.4479
2.86667	1.62064					2.68043	1.48451
2.86667	1.47489					2.68043	1.26
2.86667	1.96482					2.68043	0.98287
2.86667	2.92427					2.68043	1.10672
						2.68043	2.16132
						2.68043	0.94504
						2.68043	1.53536
						2.68043	1.59089
						2.68043	1.34557
						2.68043	1.18786
						2.68043	1.57
						2.68043	1.11
						4.13333	1.07183
						4.13333	2.19717
						4.13333	2.12
						4.13333	1.40594
						4.13333	1.7562
						4.13333	1.69772
						4.13333	1.78638
						4.13333	1.69557
						4.13333	1.13526
						4.13333	1.3753
						4.13333	1.28332
						4.13333	1.13219
						4.13333	1.08132
						4.13333	1.32792
						4.13333	1.01267
						4.13333	1.38669
						4.13333	3.15239
						4.13333	1.85
						4.13333	1.03621
						4.13333	1.8022
						4.13333	1.75692
						4.13333	2.0861
						4.13333	1.73
						4.13333	2.53588
						4.13333	1.59362
						4.13333	2.11
						4.13333	1.54
						4.13333	1.78444
						6.13	2.21403
						6.13	2.0061
						6.13	1.85
						6.13	1.93905
						6.13	2.00767
						6.13	1.29233
						6.13	1.40911
						6.13	1.06367
						6.13	1.75155
						6.13	1.62317
						6.13	1.15853
						6.13	1.86
						6.13	2.86135
						6.13	2.3725
						6.13	1.17846
						6.13	2.07669
						6.13	2.13
						6.13	1.54
						6.13	1.1375
						6.13	1.90629
						7.96	1.50328
						7.96	1.91237
						7.96	1.72785
						7.96	1.78095
						7.96	1.94733
						7.96	1.5585
						7.96	1.54969
						7.96	2.307
						7.96	1.8665
						7.96	1.71631
						7.96	1.79028
						7.96	1.38671
						11.58	1.44553
						11.58	1.75844
						11.58	1.25607
						11.58	2.09068
						11.58	1.72508
						11.58	2.23525
						11.58	1.30829
						11.58	1.71819
						11.58	1.72938
						11.58	2.1401
						11.58	1.84
						11.58	1.35366

## Sheet: Figure. 2E
60 μm probe stimuli				30 μm probe stimuli
F/F0 to 1.5 mN proximal stimuli	F/F0 to 1.5 mN distal stimuli	p value of U test		F/F0 to 4 mN proximal stimuli	F/F0 to 4 mN distal stimuli	p value of U test
2.19717	1.44793	proximal <-> distal: 0.622		1.15816	1.45609	proximal <-> distal: 0.038
2.12	1.9209			1.8072	1.73794
1.40594	1.03654			1.11759	1.82105
1.7562	1.33284			1.41174	1.67543
1.69772	1.57232			2.43189	1.00182
1.78638	1.48264			1.2762	1.47871
1.69557	2.00261			2.06387	1.22116
1.13526	1.28307			2.6102	1.28642
1.3753	2.38733			1.7438	1.33699
1.28332	1.07506			2.55231	1.01937
1.13219	1.693			2.11914	1.6251
1.08132	1.63689			2.473	1.67291
1.32792				1.75954	1.22586
1.01267				1.41784	1.43491
1.38669				1.37014	1.12
3.15239
1.85
1.8022
1.75692
2.0861

## Sheet: Figure. 2G
30 μm probe distal stimuli						60 μm probe distal stimuli						100 μm probe distal stimuli						200 μm probe distal stimuli
scatter data		average data				scatter data		average data				scatter data		average data				scatter data		average data
force (mN)	F/F0	force (mN)	mean F/F0	F/F0 error (se)		force (mN)	F/F0	force (mN)	mean F/F0	F/F0 error (se)		force (mN)	F/F0	force (mN)	mean F/F0	F/F0 error (se)		force (mN)	F/F0	force (mN)	mean F/F0	F/F0 error (se)
0.20357	0.99564	0.20357	1.03838	0.02103		0.705	0.91179	0.705	1.01703	0.01791		1.875	1.22278	1.875	1.1427	0.05883		1.69615	1.00385	1.69615	1.12164	0.0609
0.20357	1.01337	0.5625	1.07112	0.02628		0.705	1.02049	1.76786	1.11403	0.03656		1.875	1.08773	3.87	1.38845	0.07118		1.69615	1.15167	4.30312	1.19523	0.06617
0.20357	1.04182	1.0875	1.16522	0.0619		0.705	1.01927	3.03	1.29645	0.05896		1.875	1.61936	5.925	1.50047	0.09488		1.69615	1.06756	5.81	1.29335	0.05028
0.20357	1.03843	1.84615	1.4276	0.07793		0.705	1.10601	4.48333	1.57933	0.16146		1.875	1.40675	8.18333	1.56558	0.1325		1.69615	1.03301	10.65	1.41511	0.06586
0.20357	0.99315					0.705	0.98327	6.60882	1.76422	0.11949		1.875	1.22589					1.69615	1.01548
0.20357	0.96742					0.705	1.02524					1.875	1.0342					1.69615	0.99776
0.20357	0.99389					0.705	0.99597					1.875	1.01468					1.69615	1.48291
0.20357	1.00708					0.705	1.07769					1.875	1.00113					1.69615	1.06045
0.20357	1.02106					0.705	0.98664					1.875	1.01406					1.69615	1.0173
0.20357	1.10571					0.705	1.04393					1.875	1.03915					1.69615	1.01681
0.20357	1.00829					1.76786	1.01883					1.875	0.99571					1.69615	1.6758
0.20357	0.95874					1.76786	1.0127					1.875	1.05094					1.69615	1.05816
0.20357	1.20768					1.76786	1.02734					3.87	1.4908					1.69615	1.00058
0.20357	1.18505					1.76786	1.49425					3.87	1.29221					4.30312	0.94866
0.5625	1.05379					1.76786	1.18118					3.87	1.68585					4.30312	1.04195
0.5625	1.19537					1.76786	1.0023					3.87	1.61374					4.30312	1.0854
0.5625	1.07919					1.76786	1.10727					3.87	1.34771					4.30312	1.31752
0.5625	0.98125					1.76786	1.22488					3.87	1.51268					4.30312	1.2172
0.5625	1.18843					1.76786	1.03289					3.87	1.5363					4.30312	1.3609
0.5625	0.97544					1.76786	1.03231					3.87	1.15031					4.30312	1.04413
0.5625	0.98391					1.76786	1.04862					3.87	1.22633					4.30312	1.03277
0.5625	1.07236					1.76786	1.18585					3.87	1.02854					4.30312	1.38172
0.5625	1.1102					1.76786	1.0792					5.925	1.03937					4.30312	2.025
0.5625	0.96694					1.76786	1.14881					5.925	2.12893					4.30312	1.00077
0.5625	1.35007					3.03	1.22323					5.925	1.36394					4.30312	1.09797
0.5625	1.0853					3.03	1.0971					5.925	1.56183					4.30312	1.14348
0.5625	1.03519					3.03	1.3387					5.925	1.27507					4.30312	1.10516
0.5625	0.99707					3.03	1.44819					5.925	1.37079					4.30312	1.24053
0.5625	1.01343					3.03	1.4072					5.925	1.58073					4.30312	1.08052
0.5625	1.05005					3.03	1.07197					5.925	1.61617					5.81	1.11319
1.0875	1.182					3.03	1.1576					5.925	1.60268					5.81	1.64647
1.0875	0.97933					3.03	1.17348					5.925	1.46525					5.81	1.21489
1.0875	1.0334					3.03	1.59916					8.18333	1.34348					5.81	1.21609
1.0875	1.08448					3.03	1.44793					8.18333	1.05122					5.81	1.34659
1.0875	1.62353					4.48333	1.9209					8.18333	2.00197					5.81	1.07212
1.0875	1.30831					4.48333	1.03654					8.18333	1.94509					5.81	1.24987
1.0875	1.10797					4.48333	1.33284					8.18333	1.33234					5.81	1.21867
1.0875	1.47769					4.48333	1.48264					8.18333	1.16991					5.81	1.31637
1.0875	1.09898					4.48333	2.00261					8.18333	1.59862					5.81	1.29052
1.0875	0.99586					4.48333	1.28307					8.18333	2.0786					5.81	1.63973
1.0875	1.12213					4.48333	2.38733					8.18333	1.56905					5.81	1.01752
1.0875	0.969					4.48333	1.07506											5.81	1.2145
1.84615	1.45609					4.48333	1.693											5.81	1.29707
1.84615	1.73794					6.60882	1.63689											5.81	1.5467
1.84615	1.82105					6.60882	1.87635											10.65	1.02681
1.84615	1.67543					6.60882	1.27733											10.65	1.0636
1.84615	1.00182					6.60882	1.14786											10.65	1.0037
1.84615	1.47871					6.60882	1.81886											10.65	1.80854
1.84615	1.22116					6.60882	1.06134											10.65	1.62125
1.84615	1.28642					6.60882	2.03718											10.65	1.61887
1.84615	1.33699					6.60882	1.63148											10.65	1.1953
1.84615	1.01937					6.60882	2.44841											10.65	0.89937
1.84615	1.6251					6.60882	1.6727											10.65	1.74754
1.84615	1.67291					6.60882	1.25138											10.65	1.2623
1.84615	1.22586					6.60882	1.2714											10.65	1.31669
						6.60882	2.69262											10.65	1.80548
						6.60882	2.04517											10.65	1.24436
						6.60882	1.78631											10.65	1.00676
						6.60882	1.87685											10.65	1.89137
						6.60882	2.45965											10.65	1.59169
																		10.65	1.51371
																		10.65	1.35978
																		10.65	1.20064
																		10.65	1.65988
																		10.65	1.24123
																		10.65	1.72502
																		10.65	1.74366

## Sheet: Figure. 2H
30 μm probe stimuli				60 μm probe stimuli				100 μm probe stimuli				200 μm probe stimuli
P0(MPa)	mean F/F0	F/F0 error (se)		P0(MPa)	mean F/F0	F/F0 error (se)		P0(MPa)	mean F/F0	F/F0 error (se)		P0(MPa)	mean F/F0	F/F0 error (se)
1.04	1.03838	0.02103		1.7	1.01703	0.01791		1.47	1.1427	0.05883		0.86	1.12164	0.0609
2.21	1.07112	0.02628		2.13	1.11403	0.03656		1.84	1.38845	0.07118		1.4	1.19523	0.06617
2.97	1.16522	0.0619		2.5	1.29645	0.05896		2.46	1.50047	0.09488		1.6	1.29335	0.05028
3.76	1.4276	0.07793		3.1	1.57233	0.16146		3.03	1.56558	0.1325		2.27	1.41511	0.06586
				3.83	1.76422	0.11949
Ac (μm2)	mean F/F0	F/F0 error (se)		Ac (μm2)	mean F/F0	F/F0 error (se)		Ac (μm2)	mean F/F0	F/F0 error (se)		Ac (μm2)	mean F/F0	F/F0 error (se)
334	1.03838	0.02103		660.289	1.01703	0.01791		2049.12	1.1427	0.05883		3029.38	1.12164	0.0609
455.96	1.07112	0.02628		1422.43	1.11403	0.03656		3549.6	1.38845	0.07118		4797.16	1.19523	0.06617
747.38	1.16522	0.0619		2276.54	1.29645	0.05896		4170.92	1.50047	0.09488		5723.18	1.29335	0.05028
1413	1.4276	0.07793		2921.82	1.57233	0.16146		4754.14	1.56558	0.1325		7475.26	1.41511	0.06586
				4020.41	1.76422	0.11949

## Sheet: Figure. 2J
probe size		responding num	non-responding trial num		one way anova test stats
30 μm	1st trial	16	7		Group A	Group B	p-value
	2nd trial	14	4		1	2	0.9113		1: 30 μm trials
	3rd trial	23	28		1	3	0.0754		2: 60 μm trials
60 μm	1st trial	16	8		1	4	0.0013		3: 100 μm trials
	2nd trial	16	4		2	3	0.1877		4: 200 μm trials
	3rd trial	15	8		2	4	0.0027
100 μm	1st trial	15	7		3	4	0.0508
	2nd trial	14	15
	3rd trial	8	10
200 μm	1st trial	10	15
	2nd trial	6	17
	3rd trial	5	17
