# Supplementary material for: Drosophila mechanical nociceptors preferentially sense localized poking
Source: eLife journal article supplement (doi:10.7554/elife.76574), 2022-10-06
Supplement: supp [file Figure3_source data 1.xlsx]

## Sheet: Figure. 3B
	wt		ct RNAi
distance from soma (μm)	intersection density (μm)	intersection density error (std) (μm)	intersection density (μm)	intersection density error (std) (μm)
10	0.1465	0.03632	0.14331	0.03632
15	0.14437	0.04566	0.10262	0.04566
20	0.11146	0.02518	0.08493	0.02518
25	0.10191	0.02848	0.07643	0.02848
30	0.09554	0.02374	0.08846	0.02374
35	0.08917	0.0175	0.08038	0.0175
40	0.09076	0.0165	0.08493	0.0165
45	0.07926	0.02026	0.07903	0.02026
50	0.08408	0.02642	0.07537	0.02642
55	0.08338	0.01564	0.07238	0.01564
60	0.09448	0.0115	0.0805	0.0115
65	0.08525	0.01016	0.08493	0.01016
70	0.08644	0.01792	0.07658	0.01792
75	0.09597	0.02394	0.07714	0.02394
80	0.09315	0.02558	0.07497	0.02558
85	0.09966	0.0201	0.07244	0.0201
90	0.09483	0.0131	0.08198	0.0131
95	0.09789	0.02818	0.07543	0.02818
100	0.08854	0.01178	0.07431	0.01178
105	0.09524	0.01384	0.07937	0.01384
110	0.10938	0.0269	0.06948	0.0269
115	0.09803	0.02738	0.06923	0.02738
120	0.11918	0.0191	0.07033	0.0191
125	0.08968	0.02538	0.07006	0.02538
130	0.09992	0.01694	0.0641	0.01694
135	0.11295	0.01588	0.06527	0.01588
140	0.11295	0.02328	0.0618	0.02328
145	0.09884	0.0232	0.05637	0.0232
150	0.10064	0.03108	0.05839	0.03108
155	0.10068	0.03136	0.05513	0.03136
160	0.11947	0.0349	0.05673	0.0349
165	0.10616	0.0295	0.05469	0.0295
170	0.10116	0.02468	0.05495	0.02468
175	0.11137	0.02802	0.05338	0.02802
180	0.11217	0.02434	0.04571	0.02434
185	0.11809	0.02688	0.04734	0.02688
190	0.12974	0.01776	0.04386	0.01776
195	0.12576	0.0199	0.04029	0.0199
200	0.12548	0.01362	0.03795	0.01362
205	0.12801	0.018	0.03806	0.018
210	0.13254	0.0135	0.03791	0.0135
215	0.13272	0.01732	0.03481	0.01732
220	0.13202	0.01686	0.03185	0.01686
225	0.13079	0.0239	0.02902	0.0239
230	0.12434	0.00494	0.02815	0.00494
235	0.11438	0.00976	0.0271	0.00976
240	0.13084	0.01512	0.02588	0.01512
245	0.12323	0.01038	0.03068	0.01038
250	0.12153	0.0132	0.02879	0.0132
255	0.1139	0.00796	0.02423	0.00796
260	0.10853	0.02198	0.02156	0.01298
265	0.11393	0.0284	0.02211	0.012
270	0.09531	0.02948	0.02005	0.01395
275	0.09218	0.02228	0.01969	0.01228
280	0.08417	0.01572	0.0182	0.01157
285	0.07576	0.0196	0.01833	0.0096
290	0.07116	0.02174	0.01428	0.00917
295	0.0678	0.02776	0.01231	0.00928
300	0.06688	0.0256	0.01189	0.00826
305	0.05952	0.0167	0.01316	0.00817
310	0.05157	0.0164	0.01253	0.00816
315	0.0455	0.01404	0.01112	0.00714
320	0.04041	0.01352	0.01154	0.00414
325	0.03469	0.01504	0.00902	0.00315
330	0.02992	0.0123	0.00772	0.00412
335	0.02491	0.00882	0.00513	0.00112
340	0.02211	0.00624	0.00431	0.00162
345	0.01606	0.00492	0.00425	0.00149
350	0.01256	0.00528	0.00437	0.00153
355	0.00879	0.00378	0.00413	0.00138
360	0.00725	0.00498	0.00376	0.0015
365	0.00558	0.00412	0.00291	0.00141
370	0.00409	0.00226	0.0023	0.00123
375	0.00425	0.00306	0.00198	0.00131
380	0.0021	0.000592614	0.00196	0.000592614
385	0.00207	0.000584918	0.00193	0.000584918
390	0.00163	0	0.00272	0
395	0.00161	0	0.00242	0
400	0.000796178	0	0.00318	0
405	0.000393174	0	0.00275	0
410			0.00872	0.0012
415			0.00607	0.000479584
420			0.00474	0.00132
425			0.00246	0.000119896
430			0.00265	0
435			0.00265	0

## Sheet: Figure. 3C
F/F0 to 4 mN proximal stimuli					F/F0 to 4 mN distal stimuli
wt	scrambled RNAi	cti	p value of U-test		wt	scrambled RNAi	cti d-on	cti d-off	p value of U-test
2.19717	2.34622	1.11078	wt <->scrambled RNAi: 0.881		1.44793	2.2715	1.02793	1.00268	wt <->scrambled RNAi: 0.728
2.12	2.10814	1.81757	wt <->cti: 0.593		1.9209	2.05151	0.98007	1.0746	wt <-> cti d-on: 0.031
1.40594	2.04251	1.88821			1.03654	1.69707	1.0403	1.15567	cti d-on <-> cti d-off: 0.765
1.7562	1.89707	1.26611			1.33284	1.79281	1.29065	1.30186
1.69772	1.84297	1.2065			1.48264	1.74648	1.10499	1.11494
1.78638	1.6027	2.1552			2.00261	1.62201	1.09013	1.01702
1.69557	1.70278	1.11637			1.28307	1.5972	1.74467	1.11997
1.13526	1.55604	2.22305			2.38733	1.58305	1.56889	1.07178
1.3753	1.58173	1.13212			1.07506	1.45473	1.30867	1.30989
1.28332	1.59458	1.104			1.693	1.45562	1.06988	1.40714
1.13219	1.30744	2.19278			1.63689	1.3038	1.44346	1.04716
1.08132	1.35913	1.26007				1.27164	1.32442	1.66468
1.32792	1.2948	1.46866				1.06572	1.07991	1.28883
1.01267	1.30511						1.07605	1.0656
1.38669	1.20469
3.15239
1.85
1.8022
1.75692
2.0861

## Sheet: Figure. 3D
cti c4da respond to 30 μm probe distal stimuli						cti c4da respond to 60 μm probe distal stimuli						cti c4da respond to 100 μm probe distal stimuli						the wt data are shown in Figure. 2G sheet in Figure2_source data table
scatter data		average data				scatter data		average data				scatter data		average data
force (mN)	F/F0	force (mN)	mean F/F0	F/F0 error (se)		force (mN)	F/F0	force (mN)	mean F/F0	F/F0 error (se)		force (mN)	F/F0	force (mN)	mean F/F0	F/F0 error (se)
0.2	0.965	0.2	1.017	0.02474		0.69375	1.03654	0.69375	1.0181	0.01415		1.28438	1.03785	1.28438	1.05769	0.02404
0.2	0.98	0.68333	1.00029	0.0165		0.69375	0.98951	1.62692	1.15279	0.07725		1.28438	0.99901	3.20455	1.24065	0.10089
0.2	1.01	1.15	1.0804	0.04599		0.69375	1.06901	2.74091	1.25935	0.08231		1.28438	1.0307	5.48333	1.38249	0.09096
0.2	1.03	1.83214	1.1269	0.05579		0.69375	0.98733	4.17692	1.29715	0.08708		1.28438	1.11491	8.46667	1.53782	0.11681
0.2	1.12					0.69375	1.04712	6.175	1.33269	0.0656		1.28438	1.01394
0.2	0.997					0.69375	0.98216					1.28438	1.0115
0.68333	1.03209					0.69375	1.03618					1.28438	0.99804
0.68333	1.04418					0.69375	1.02381					1.28438	1.14244
0.68333	0.97908					0.69375	0.96223					1.28438	1.0584
0.68333	0.88998					0.69375	0.97899					1.28438	1.04519
0.68333	1.00134					0.69375	1.09275					1.28438	1.15224
0.68333	0.99536					0.69375	0.9941					1.28438	0.83188
0.68333	0.99949					0.69375	0.952					1.28438	1.20088
0.68333	1.02732					0.69375	0.97953					1.28438	1.23812
0.68333	1.0338					0.69375	0.98766					1.28438	1.04138
1.15	1.54938					0.69375	1.17062					1.28438	1.0066
1.15	1.04406					1.62692	0.98152					3.20455	1.00193
1.15	1.03127					1.62692	1.00831					3.20455	0.99873
1.15	0.89346					1.62692	1.29174					3.20455	1.12143
1.15	0.98163					1.62692	1.28864					3.20455	1.12012
1.15	1.04568					1.62692	1.74007					3.20455	1.00258
1.15	0.95635					1.62692	1.69559					3.20455	1.04243
1.15	0.97963					1.62692	0.97912					3.20455	1.16755
1.15	1.08357					1.62692	0.98576					3.20455	1.43735
1.15	1.39653					1.62692	0.98973					3.20455	1.10421
1.15	0.96965					1.62692	0.91314					3.20455	1.56763
1.15	1.00401					1.62692	1.15527					3.20455	2.08324
1.15	1.06835					1.62692	0.99698					5.48333	1.05665
1.15	1.11359					1.62692	0.96036					5.48333	1.38062
1.15	1.08885					2.74091	1.18366					5.48333	1.42887
1.83214	1.00281					2.74091	1.39381					5.48333	1.13084
1.83214	1.04171					2.74091	1.35935					5.48333	1.24628
1.83214	1.05276					2.74091	1.00646					5.48333	1.83854
1.83214	1.10613					2.74091	1.08627					5.48333	1.49391
1.83214	1.02686					2.74091	1.87179					5.48333	1.13337
1.83214	1.65996					2.74091	1.26392					5.48333	1.7333
1.83214	1.09992					2.74091	1.56266					8.46667	1.58225
1.83214	1.00908					2.74091	1.02793					8.46667	1.10008
1.83214	1.05789					2.74091	0.9854					8.46667	1.10484
1.83214	1.51944					2.74091	1.1116					8.46667	2.12219
1.83214	1.03763					4.17692	1.0403					8.46667	1.65938
1.83214	1.08848					4.17692	1.29065					8.46667	1.28422
1.83214	1.08266					4.17692	1.9694					8.46667	1.91261
1.83214	0.99121					4.17692	1.10499					8.46667	1.6793
						4.17692	1.09013					8.46667	1.39553
						4.17692	1.74467
						4.17692	1.56889
						4.17692	1.30867
						4.17692	1.06988
						4.17692	1.44346
						4.17692	1.32442
						4.17692	0.92747
						4.17692	0.98007
						6.175	1.48803
						6.175	1.09171
						6.175	1.51122
						6.175	1.77816
						6.175	1.30113
						6.175	1.06243
						6.175	1.40742
						6.175	1.53977
						6.175	1.36815
						6.175	1.07991
						6.175	1.07605
						6.175	1.2883

## Sheet: Figure. 3E
genotype	probe size		responding num	non-responding trial num		one way anova test stats
wt	30 μm	1st trial	16	7		probe size	Group A	Group B	p-value
		2nd trial	14	4		30 μm	1	2	0.9991		1: wt
		3rd trial	23	28			1	3	0.9375		2: ppk-gal4
	60 μm	1st trial	16	8			1	4	0.0043		3: uas-cti
		2nd trial	16	4			2	3	0.9698		4: cti
		3rd trial	15	8			2	4	0.0052
	100 μm	1st trial	15	7			3	4	0.01
		2nd trial	14	15		60 μm	1	2	0.9808
		3rd trial	8	10			1	3	0.9595
ppk-gal4	30 μm	1st trial	25	2			1	4	0.0012
		2nd trial	12	9			2	3	0.9994
		3rd trial	11	4			2	4	0.0019
	60 μm	1st trial	16	5			3	4	0.0022
		2nd trial	11	6		100 μm	1	2	0.7909
		3rd trial	14	8			1	3	0.9998
	100 μm	1st trial	9	11			1	4	0.9118
		2nd trial	11	13			2	3	0.8314
		3rd trial	12	12			2	4	0.9857
uas-cti	30 μm	1st trial	12	9			3	4	0.9398
		2nd trial	17	4
		3rd trial	19	7
	60 μm	1st trial	12	8
		2nd trial	19	7
		3rd trial	18	8
	100 μm	1st trial	12	8
		2nd trial	12	8
		3rd trial	9	14
cti	30 μm	1st trial	10	14
		2nd trial	6	16
		3rd trial	9	18
		4th trial	9	15
	60 μm	1st trial	9	26
		2nd trial	8	11
		3rd trial	6	15
		4th trial	7	9
	100 μm	1st trial	15	12
		2nd trial	10	10
		3rd trial	11	14
		4th trial	9	10
