# Supplementary material for: Drosophila mechanical nociceptors preferentially sense localized poking
Source: eLife journal article supplement (doi:10.7554/elife.76574), 2022-10-06
Supplement: supp [file Figure4_source data 1.xlsx]

## Sheet: Figure. 4A
wt c4da's responses to 60 μm probe stimuli					the dsital stimuli data are shown in Figure. 2E sheet in Figure2_source data table
F/F0 to 4 mN d-off stimuli (0-20 μm)	F/F0 to 4 mN d-off stimuli (20-40 μm)	F/F0 to 4 mN d-off stimuli (40-60 μm)	F/F0 to 4 mN d-off stimuli (over 60 μm)	p value of U-test compared with the responses to distal stimuli
1.88519	1.43345	1.41412	1.09287	responses to d-off stimuli (0-20 μm): 0.442
1.4652	1.22553	1.27704	1.16697	responses to d-off stimuli (20-40 μm): 0.340
1.07452	1.58741	1.27704	1.08947	responses to d-off stimuli (40-60 μm): 0.013
1.25064	1.32	1.24911	1.13181	responses to d-off stimuli (over 60 μm): 0.005
1.59283	1.16	1.06036	1.13181
1.52411	1.8386	1.0252	1.06956
1.17105	1.05596	1.07265	0.99383
1.59769	1.47613	1.3954	1.0598
1.11909	1.47613	1.13211	1.06702
1.4655	1.3386	1.30341	1.14702
1.42	1.51	1.30341	1.25806
1.537	1.35185	1.29682	1.13526
		1.23408	1.41516
		1.27643

## Sheet: Figure. 4B
60 μm probe				30 μm probe
r (μm)	normalized TL (kPa)	normalized PP (kPa)		r (μm)	normalized TL (kPa)	normalized PP (kPa)
0.58703	0.08404	1		0.638395	0.13272	1
1.76299	0.09093	0.9959		1.91593	0.12606	0.99246
2.94184	0.16502	0.98978		3.19068	0.24182	0.98018
4.12176	0.21451	0.9836		4.45546	0.31934	0.96558
5.30377	0.27751	0.97553		5.70754	0.39415	0.94691
6.48689	0.33031	0.96382		6.94353	0.47952	0.92103
7.66659	0.39479	0.94702		8.15504	0.54907	0.88805
8.84092	0.44463	0.92683		9.3369	0.63312	0.84762
10.0087	0.52151	0.90255		10.4882	0.71546	0.80174
11.1686	0.56527	0.87631		11.6067	0.7774	0.75192
12.3199	0.65263	0.84429		12.695	0.8727	0.69474
13.4572	0.69261	0.81097		13.751	0.9061	0.63785
14.5805	0.77833	0.76983		14.7795	0.97934	0.57149
15.6884	0.81992	0.72811		15.7865	0.98233	0.51059
16.7794	0.89119	0.67903		16.7764	1	0.44474
17.8557	0.93622	0.6289		17.7589	0.96841	0.38743
18.9142	0.97205	0.57468		18.7369	0.92829	0.33169
19.9572	0.99745	0.51699		19.7155	0.86674	0.28273
20.9911	1	0.46151		20.6996	0.79606	0.24142
22.0171	0.98517	0.40717		21.6925	0.72444	0.20564
23.0369	0.95472	0.35307		22.6946	0.65348	0.17415
24.0562	0.90185	0.30535		23.7072	0.58509	0.14871
25.0782	0.84105	0.26181		24.7311	0.52225	0.12647
26.105	0.77273	0.22337		25.7661	0.46402	0.10755
27.139	0.70121	0.19008		26.8127	0.41037	0.09131
28.1817	0.63098	0.16223		27.8706	0.36315	0.07829
29.2339	0.56556	0.13835		28.9392	0.32066	0.06659
30.2968	0.50603	0.11789		30.0191	0.28404	0.0567
31.37	0.45021	0.09995		31.1096	0.2504	0.04795
32.4529	0.39881	0.08512		32.2094	0.22012	0.0407
33.5464	0.35194	0.07209		33.3194	0.19239	0.03425
34.6506	0.31066	0.0611		34.4393	0.16868	0.02889
35.7649	0.27419	0.05178		35.5686	0.14782	0.02429
36.8892	0.24036	0.04365		36.7071	0.12861	0.02034
38.0234	0.21138	0.03704		37.8546	0.11215	0.01709
39.1671	0.18558	0.03103		39.0108	0.09786	0.01417
40.3203	0.16235	0.02574		40.1758	0.0849	0.01157
41.4829	0.14207	0.02153		41.3494	0.07361	0.00953
42.6541	0.12363	0.01795		42.5308	0.06359	0.00785
43.8342	0.10777	0.01485		43.7204	0.05472	0.00634
45.0232	0.09321	0.01208		44.9183	0.04691	0.00504
46.2203	0.08039	0.00985		46.1236	0.03978	0.00397
47.4261	0.06899	0.00799		47.3369	0.03376	0.00313
48.6403	0.05997	0.00654		48.558	0.02898	0.00248
49.8623	0.05172	0.00516		49.7865	0.02459	0.00184
51.0924	0.04434	0.00397		51.0226	0.02068	0.00129
52.3306	0.03787	0.00311		52.266	0.01734	0.000933732
53.5761	0.03223	0.00241		53.5166	0.01433	0.000640597
54.8293	0.0271	0.0017		54.7745	0.0117	0.000324543
56.0904	0.02262	0.00116		56.0398	0.00932	9.16866e-05
57.3588	0.01888	0.000819707		57.3122	0.00741	-2.65103e-05
58.6347	0.01558	0.000516239		58.5917	0.00573	-0.000134967
59.918	0.01271	0.000225184		59.8782	0.00425	-0.000249092

## Sheet: Figure. 4D
		only PP		only TL		PP + TL
probe size	Cd (μm)	average responding possibility	possiblility error (std)	average responding possibility	possiblility error (std)	average responding possibility	possiblility error (std)
30 μm	20	0.954	0.025	0.967	0.0609	0.975	0.048
	200	0.226	0.106	0.814	0.095	0.885	0.094
	400	0.004	0.002	0.264	0.164	0.55	0.163
60 μm	20	0.97	0.02915	0.99	0.01	0.99	0.01
	200	0.446	0.16242	0.878	0.07727	0.88	0.0745
	400	0.01	0.02236	0.45	0.16171	0.45	0.16171
