# Supplementary material for: Drosophila mechanical nociceptors preferentially sense localized poking
Source: eLife journal article supplement (doi:10.7554/elife.76574), 2022-10-06
Supplement: supp [file Figure5_source data 1.xlsx]

## Sheet: Figure. 5B
	piezoKO		ppk261		piezoKO, ppk1Δ5		the wt data are shown in Figure. 3B sheet in Figure3_source data table
distance from soma (μm)	intersection density (μm)	intersection density error (std) (μm)	intersection density (μm)	intersection density error (std) (μm)	intersection density (μm)	intersection density error (std) (μm)
10	0.16986	0.01838	0.19108	0.03184	0.15924	0.05516
15	0.1557	0.04904	0.1557	0.01226	0.12032	0.0858
20	0.14332	0.05742	0.09554	0	0.09554	0.04212
25	0.10192	0.02548	0.08492	0.01946	0.08918	0.01274
30	0.10262	0.04904	0.06724	0.01226	0.08138	0.01622
35	0.11526	0.04202	0.06672	0.0105	0.07886	0.0278
40	0.1035	0.0138	0.06634	0.01838	0.07696	0.02432
45	0.10616	0.01226	0.08256	0.01782	0.0802	0.01474
50	0.09554	0.01104	0.09554	0.03874	0.08068	0.0301
55	0.10036	0.01862	0.08106	0.02524	0.08878	0.0234
60	0.11146	0.01592	0.0743	0.01838	0.092	0.02672
65	0.1029	0.00848	0.08166	0.02264	0.08656	0.0198
70	0.1198	0.02588	0.06066	0.01598	0.08038	0.01894
75	0.11464	0.00736	0.07644	0.00736	0.08776	0.01068
80	0.11544	0.02106	0.07564	0.0138	0.08228	0.00608
85	0.12614	0.0177	0.08242	0.00992	0.08492	0.01418
90	0.12268	0.01948	0.08256	0.01816	0.0979	0.02012
95	0.1028	0.02426	0.08604	0.01688	0.08604	0.0202
100	0.09766	0.0192	0.09024	0.03346	0.09448	0.02072
105	0.1193	0.01368	0.08392	0.01724	0.092	0.02544
110	0.10616	0.0117	0.09168	0.02192	0.09748	0.03202
115	0.11816	0.01048	0.09232	0.01844	0.09692	0.01466
120	0.10616	0.00702	0.09288	0.01614	0.1035	0.01658
125	0.09512	0.01308	0.09172	0.02038	0.10446	0.00918
130	0.11596	0.0051	0.09064	0.03184	0.11024	0.00848
135	0.1266	0.013	0.10302	0.0295	0.1093	0.00492
140	0.1289	0.01076	0.09402	0.02368	0.11222	0.00862
145	0.1186	0.00958	0.09738	0.0279	0.10176	0.00336
150	0.1281	0.00682	0.08918	0.01814	0.09766	0.00562
155	0.11506	0.00896	0.10548	0.02736	0.09726	0.0171
160	0.11678	0.01912	0.11412	0.02886	0.09686	0.00754
165	0.11002	0.00842	0.11194	0.03574	0.08492	0.00193
170	0.11678	0.00924	0.0943	0.0278	0.0968	0.00942
175	0.12132	0.02652	0.10556	0.03716	0.10312	0.00688
180	0.1209	0.00446	0.10852	0.03386	0.09732	0.0116
185	0.11936	0.00554	0.10386	0.04594	0.10558	0.0201
190	0.119	0.0102	0.12236	0.0266	0.1095	0.01446
195	0.11052	0.01236	0.10506	0.0157	0.09908	0.0136
200	0.10404	0.00802	0.10988	0.01722	0.112	0.00512
205	0.11238	0.00358	0.10306	0.02974	0.10564	0.00412
210	0.11476	0.01758	0.10414	0.02178	0.1097	0.0152
215	0.12048	0.00372	0.10616	0.0328	0.1032	0.0126
220	0.10182	0.00586	0.10182	0.02216	0.10374	0.01376
225	0.1071	0.00654	0.10332	0.01774	0.10096	0.0173
230	0.09092	0.01002	0.10154	0.02322	0.09832	0.0123
235	0.1057	0.00846	0.103	0.02374	0.09712	0.0164
240	0.1128	0.00928	0.09996	0.01556	0.09288	0.01436
245	0.1053	0.01134	0.09446	0.0242	0.09272	0.02214
250	0.107	0.01838	0.093	0.02544	0.09342	0.01848
255	0.10032	0.0149	0.09326	0.02062	0.09118	0.0139
260	0.10044	0.02532	0.09594	0.0282	0.0935	0.02292
265	0.10054	0.02168	0.08974	0.00486	0.08854	0.01958
270	0.10262	0.03128	0.0865	0.00414	0.0802	0.01082
275	0.09998	0.02226	0.08956	0.01182	0.08686	0.01748
280	0.0982	0.02966	0.0853	0.01312	0.07166	0.00634
285	0.0853	0.01754	0.0812	0.01062	0.0663	0.01414
290	0.09114	0.03062	0.08054	0.00444	0.0648	0.01436
295	0.07916	0.02026	0.07378	0.00348	0.05902	0.01296
300	0.0729	0.03714	0.07324	0.00212	0.06298	0.01004
305	0.06682	0.03726	0.07066	0.00594	0.05708	0.00672
310	0.06506	0.0332	0.0613	0.01054	0.05924	0.00652
315	0.05932	0.03248	0.05426	0.00508	0.05762	0.00828
320	0.06436	0.03674	0.0544	0.007	0.05672	0.00358
325	0.05258	0.0293	0.05194	0.00686	0.05716	0.0152
330	0.04986	0.01892	0.05372	0.01068	0.05662	0.01604
335	0.03866	0.01378	0.04182	0.00436	0.05418	0.00964
340	0.03404	0.0147	0.04122	0.0043	0.05402	0.0089
345	0.0283	0.0111	0.03816	0.01496	0.0483	0.00524
350	0.0279	0.01566	0.03124	0.0086	0.04306	0.00534
355	0.02422	0.00946	0.02752	0.00804	0.03648	0.00774
360	0.02064	0.0089	0.02536	0.01188	0.03244	0.01252
365	0.01658	0.00842	0.02704	0.0132	0.0349	0.01302
370	0.0175	0.01034	0.02038	0.01278	0.02956	0.00944
375	0.01528	0.00664	0.01586	0.00954	0.0252	0.01238
380	0.0095	0.00712	0.019	0.01384	0.02626	0.00848
385	0.00744	0.00704	0.01352	0.01102	0.0182	0.0036
390	0.00654	0.00694	0.01334	0.01464	0.01742	0.00412
395	0.00484	0.00492	0.01128	0.01328	0.01398	0.00123
400	0.00398	0.0046	0.01088	0.01336	0.01434	0.00138
405	0.00498	0.005	0.00708	0.00886	0.0131	0.00276

## Sheet: Figure. 5C
piezo KO c4da respond to 30 μm probe proximal stimuli						ppk261 c4da respond to 30 μm probe proximal stimuli						piezoKO c4da respond to 60 μm probe proximal stimuli						ppk261 c4da respond to 60 μm probe proximal stimuli						the wt data are shown in Figure. 2C sheet in Figure2_source data table
scatter data		average data				scatter data		average data				scatter data		average data				scatter data		average data
force (mN)	F/F0	force (mN)	mean F/F0	F/F0 error (se)		force (mN)	F/F0	force (mN)	mean F/F0	F/F0 error (se)		force (mN)	F/F0	force (mN)	mean F/F0	F/F0 error (se)		force (mN)	F/F0	force (mN)	mean F/F0	F/F0 error (se)
0.35625	1.04769	0.35625	1.00221	0.02344		0.31	1.0054	0.31	0.99056	0.01341		1.33661	1.06311	0.958	1.0101	0.07144		0.675	1.16285	0.675	1.02774	0.0324
0.35625	0.93728	0.77727	1.10483	0.07979		0.31	1.02107	0.85	1.00242	0.01351		1.33661	2.04229	1.859	1.10849	0.0735		0.675	1.03601	1.25	1.01462	0.01481
0.35625	0.97746	1.32	1.33773	0.11055		0.31	0.96008	1.55	1.12469	0.09666		1.33661	0.98535	3.16116	1.35021	0.19987		0.675	1.00968	2.425	1.00421	0.01526
0.35625	0.97156	2.03182	1.75581	0.16787		0.31	0.96462	2.1475	1.03518	0.02731		1.33661	1.01705	4.25294	1.52863	0.11294		0.675	1.00396	3.9	1.27541	0.20323
0.35625	1.00697					0.31	1.00165					1.33661	1.16409	5.87167	1.636	0.13129		0.675	1.00755	5.87727	1.33385	0.15661
0.35625	1.02999					0.31	1.00569					1.33661	1.14638					0.675	0.94641
0.35625	1.11663					0.31	1.02355					1.33661	1.30466					1.25	1.00795
0.35625	0.9301					0.85	1.03298					1.33661	1.05222					1.25	1.02088
0.77727	0.97043					0.85	0.98271					1.33661	1.0314					1.25	0.96171
0.77727	1.23762					0.85	1.03103					1.33661	1.02229					1.25	1.00019
0.77727	1.01782					0.85	0.9837					1.33661	1.23578					1.25	1.04148
0.77727	1.03238					0.85	0.98169					1.33661	1.15634					1.25	1.05551
0.77727	1.16455					0.85	0.99569					1.33661	1.0332					2.425	1.01899
0.77727	0.95536					0.85	1.10235					1.33661	1.22394					2.425	0.96967
0.77727	0.93448					1.55	0.9839					2.20881	1.0671					2.425	1.06446
0.77727	1.81459					1.55	1.31572					2.20881	0.99608					2.425	0.98829
0.77727	1.02451					1.55	0.92836					2.20881	1.27775					2.425	0.98139
0.77727	1.0256					1.55	1.0126					2.20881	1.09725					2.425	1.00245
0.77727	0.97583					1.55	1.03832					2.20881	1.53139					3.9	1.07383
1.32	1.14143					1.55	1.46923					2.20881	1.76916					3.9	1.06454
1.32	1.05693					1.55	1.12568					2.20881	0.96003					3.9	1.03876
1.32	1.89068					1.55	1.02546					2.20881	1.21006					3.9	0.95655
1.32	1.05012					2.1475	1.09195					2.20881	1.19972					3.9	2.74723
1.32	1.6865					2.1475	1.09267					2.20881	1.29213					3.9	1.02778
1.32	1.16279					2.1475	0.97463					2.20881	1.50449					3.9	1.05864
1.32	1.78091					2.1475	0.9856					2.20881	1.57721					3.9	1.00555
1.32	1.19099					2.1475	0.97843					2.60455	2.00645					3.9	1.50577
1.32	1.40914					2.1475	1.08778					2.60455	1.45275					5.87727	1.5075
1.32	1.00781					2.1475	1.05698					2.60455	1.5737					5.87727	1.01726
2.03182	1.03263					2.1475	1.01257					3.16116	1.2329					5.87727	2.23025
2.03182	2.10235											3.16116	1.05892					5.87727	0.95243
2.03182	2.18264											3.16116	1.84095					5.87727	0.99229
2.03182	2.3332											3.16116	1.00371					5.87727	1.00902
2.03182	1.36984											3.16116	1.17142					5.87727	1.1424
2.03182	1.02217											3.16116	1.56748					5.87727	1.57769
2.03182	2.27398											3.16116	1.06667					5.87727	1.01535
2.03182	1.83371											3.16116	1.29676					5.87727	2.24514
2.03182	1.30053											3.16116	1.6765					5.87727	0.983
2.03182	2.39437											3.16116	2.20938
2.03182	1.46853											3.16116	1.33972
												3.16116	1.11323
												3.16116	1.02122
												3.16116	2.05813
												4.25294	1.15029
												4.25294	1.12461
												4.25294	1.78676
												4.25294	1.58087
												4.25294	2.06964
												4.25294	1.08106
												4.25294	0.99399
												4.25294	1.09738
												4.25294	2.18338
												4.25294	2.18077
												4.25294	1.31982
												5.87167	1.1993
												5.87167	1.10834
												5.87167	1.17936
												5.87167	1.94742
												5.87167	1.89558
												5.87167	1.54962
												5.87167	1.78912
												5.87167	1.26074
												5.87167	2.58164
												5.87167	2.02265
												5.87167	1.22786
												5.87167	1.0844
												5.87167	2.50755
												5.87167	1.75361
												5.87167	1.06415

## Sheet: Figure. 5D
piezo KO c4da respond to 30 μm probe distal stimuli						ppk261 c4da respond to 30 μm probe distal stimuli						piezoKO c4da respond to 60 μm probe distal stimuli						ppk261 c4da respond to 60 μm probe distal stimuli						the wt data are shown in Figure. 2G sheet in Figure2_source data table
scatter data		average data				scatter data		average data				scatter data		average data				scatter data		average data
force (mN)	F/F0	force (mN)	mean F/F0	F/F0 error (se)		force (mN)	F/F0	force (mN)	mean F/F0	F/F0 error (se)		force (mN)	F/F0	force (mN)	mean F/F0	F/F0 error (se)		force (mN)	F/F0	force (mN)	mean F/F0	F/F0 error (se)
0.27273	1.01142	0.27273	1.01893	0.01758		0.38571	0.9941	0.38571	1.0115	0.0132		0.8625	1.05429	0.8625	1.0075	0.01709		0.5875	1.04173	0.5875	0.99331	0.00964
0.27273	0.95311	0.705	1.02905	0.02567		0.38571	1.00946	0.7825	1.00713	0.00733		0.8625	0.99412	1.61667	0.98206	0.01936		0.5875	0.99836	1.65	0.99796	0.00608
0.27273	1.08727	1.3	1.03641	0.02847		0.38571	0.99783	1.432	1.04247	0.03395		0.8625	1.00088	2.7	1.08875	0.09999		0.5875	0.97753	2.35	1.03018	0.03771
0.27273	0.9803	2.025	1.12677	0.04866		0.38571	0.98126	2.2125	1.00994	0.01142		0.8625	0.96622	4.26667	1.33086	0.21408		0.5875	0.93541	3.94091	1.15058	0.08328
0.27273	1.06807					0.38571	1.07954					0.8625	1.06733	6.45	1.57886	0.23687		0.5875	0.97462	6.13636	1.26341	0.11979
0.27273	0.99063					0.38571	1.01966					0.8625	0.93317					0.5875	1.01373
0.27273	1.03051					0.38571	0.99864					0.8625	1.04041					0.5875	0.94498
0.27273	1.02071					0.7825	0.98285					0.8625	1.00361					0.5875	1.00699
0.27273	0.95016					0.7825	1.02289					1.61667	0.9852					0.5875	1.01943
0.27273	1.12591					0.7825	0.9925					1.61667	0.99385					0.5875	0.99005
0.27273	0.9901					0.7825	0.99503					1.61667	1.03175					0.5875	0.9881
0.705	1.05764					0.7825	1.01224					1.61667	0.93474					0.5875	1.02879
0.705	0.94612					0.7825	1.01097					1.61667	0.97825					1.65	1.0004
0.705	1.06296					0.7825	1.03344					1.61667	1.0523					1.65	1.01746
0.705	1.071					1.432	1.02687					1.61667	0.96219					1.65	0.97491
0.705	0.97498					1.432	1.03372					1.61667	0.87351					1.65	1
0.705	1.04396					1.432	0.99324					1.61667	1.02672					1.65	0.99821
0.705	0.9581					1.432	0.99865					2.7	1.1044					1.65	0.99679
0.705	0.95309					1.432	1.15987					2.7	1.11354					2.35	0.98006
0.705	1.19872					1.432	1.00266					2.7	0.92194					2.35	0.97801
0.705	1.0239					1.432	1.02547					2.7	1.00916					2.35	0.97552
1.3	0.93539					1.432	1.112					2.7	1.01159					2.35	1.19043
1.3	1.03325					2.2125	1.01824					2.7	0.92423					2.35	0.99991
1.3	1.02678					2.2125	1.00182					2.7	0.93835					2.35	1.05718
1.3	1.09284					2.2125	0.97869					2.7	0.95744					3.94091	1.92194
1.3	1.19032					2.2125	0.97692					2.7	1.81808					3.94091	1.03772
1.3	1.09851					2.2125	1.11025					4.26667	2.90381					3.94091	1.05106
1.3	0.9854					2.2125	0.98755					4.26667	1.00962					3.94091	1.18636
1.3	0.94773					2.2125	1.01245					4.26667	1.27358					3.94091	1.05112
1.3	1.01752											4.26667	1.30884					3.94091	1.02359
2.025	1.11658											4.26667	1.14151					3.94091	1.01094
2.025	1.07988											4.26667	1.30874					3.94091	1.10038
2.025	1.0324											4.26667	1.04808					3.94091	1.19262
2.025	0.99264											4.26667	1.04545					3.94091	1.02293
2.025	0.97583											4.26667	0.93811					3.94091	1.05775
2.025	1.16539											6.45	1.19542					6.13636	1.01777
2.025	1.39284											6.45	2.86865					6.13636	1.36285
2.025	1.08395											6.45	1.02947					6.13636	2.16433
2.025	1.50617											6.45	2.45502					6.13636	1.01217
2.025	1.0791											6.45	2.34254					6.13636	1.00914
2.025	1.01777											6.45	1.50733					6.13636	1.35712
2.025	1.07864											6.45	1.42949					6.13636	1.32944
												6.45	1.02255					6.13636	1.03064
												6.45	0.94686					6.13636	0.8978
												6.45	0.99131					6.13636	1.03686
																		6.13636	1.67938

## Sheet: Figure. 5E
piezoKO, ppk1Δ5 c4da respond to 60 μm probe proximal stimuli						piezoKO, ppk1Δ5 c4da respond to 60 μm probe distal stimuli						the wt data are shown in Figure. 2B and 2G sheet in Figure2_source data table
scatter data		average data				scatter data		average data
force (mN)	F/F0	force (mN)	mean F/F0	F/F0 error (se)		force (mN)	F/F0	force (mN)	mean F/F0	F/F0 error (se)
0.63	1.02814	0.63	0.99444	0.00812		0.6	0.98641	0.6	0.98898	0.00786
0.63	0.9478	1.71	1.05766	0.02286		0.6	0.98569	1.62	0.98356	0.0245
0.63	0.9939	3.03333	1.1119	0.06643		0.6	0.98869	2.93	1.04755	0.02546
0.63	1.02057	4.65	1.13883	0.08366		0.6	0.96529	4.02	1.03518	0.0356
0.63	0.96991	6.7875	1.14041	0.11703		0.6	0.97586	6.201	1.01444	0.0056
0.63	0.98462					0.6	0.98721
0.63	1.00929					0.6	1.0337
0.63	0.98052					1.62	0.9858
0.63	1.00735					1.62	0.96521
0.63	1.00231					1.62	1.02314
1.71	1.22406					1.62	1.00125
1.71	1.10663					1.62	0.96575
1.71	1.05548					1.62	0.96021
1.71	1.02959					2.93	1.05365
1.71	0.98036					2.93	1.10021
1.71	0.99436					2.93	0.97564
1.71	1.04842					2.93	0.96213
1.71	1.02079					2.93	1.09802
1.71	1.0627					2.93	1.09564
1.71	1.05416					4.02	1.0459
3.03333	0.97495					4.02	1.11027
3.03333	0.97565					4.02	0.95213
3.03333	1.20587					4.02	0.982
3.03333	1.14008					4.02	0.9741
3.03333	1.56104					4.02	1.02487
3.03333	1.02412					4.02	1.15699
3.03333	1.00915					6.201	0.99215
3.03333	1.1277					6.201	1.01235
3.03333	0.9885					6.201	1.02224
4.65	1.09809					6.201	0.97548
4.65	1.08356					6.201	1.04872
4.65	0.91246					6.201	1.03569
4.65	1.6117
4.65	1.30278
4.65	1.06146
4.65	0.98533
4.65	1.05527
6.7875	0.9745
6.7875	1.89621
6.7875	1.04213
6.7875	0.97887
6.7875	1.01889
6.7875	1.02625
6.7875	1.04641
6.7875	1.14

## Sheet: Figure. 5F
60 μm probe stimuli					the wt data are shown in Figure. 4A sheet in Figure4_source data table
piezoKO c4da's responses to 4 mN distal stimuli	piezoKO c4da's responses to 4 mN d-off stimuli	ppk261 c4da's responses to 4 mN distal stimuli	ppk261 c4da's responses to 4 mN d-off stimuli	p value of U-test
0.93835	1.00795	0.99991	1.03628	wt d-off (0-20 μm) <-> piezo KO d-off: 0.004
0.95744	1.01122	1.05718	1.4971	wt d-off (0-20 μm) <-> ppk261 d-off: 4.85116E-4
1.81808	1.10432	1.92194	1.26401	piezo KO distal <-> piezo KO d-off: 1
2.90381	1.0041	1.03772	1.00193	ppk261 distal <-> ppk261 d-off: 0.678
1.00962	1.08566	1.05106	0.99854
1.27358	1.53514	1.18636	1.10483
1.30884	0.99489	1.05112	1.03313
1.14151	0.99124	1.02359	1.1274
1.30874	1.08477	1.01094	0.96738
1.04808	1.03484	1.10038	1.03889
1.04545	1.49128	1.19262	1.01933
0.93811	1.49361	1.02293	0.96724
0.94686	0.98205	1.05775	1.06298
0.99131		1.01777	1.09431
1.19542		1.36285	1.20804

## Sheet: Figure. 5G
genotype	probe size		responding num	non-responding trial num
wt	30 μm	1st trial	16	7
		2nd trial	14	4
		3rd trial	23	28		one way anova test stats
	60 μm	1st trial	16	8		probe size	Group A	Group B	p-value
		2nd trial	16	4		30 μm	1	2	0.0001		1: wt
		3rd trial	15	8			1	3	0.812		2：piezoKO
piezoKO	30 μm	1st trial	6	8			1	4	0		3：piezoko rescue
		2nd trial	5	20			1	5	0		4：ppk261
		3rd trial	7	24			2	3	0.0004		5：piezoKO，ppk1Δ5
	60 μm	1st trial	11	8			2	4	0.0518
		2nd trial	16	10			2	5	0.013
		3rd trial	13	5			3	4	0
piezoko rescue	30 μm	1st trial	16	6			3	5	0
		2nd trial	12	5			4	5	0.8925
		3rd trial	7	4		60 μm	1	2	0.661
	60 μm	1st trial	12	4			1	3	0.9607
		2nd trial	8	2			1	4	0
		3rd trial	14	7			1	5	0
ppk261	30 μm	1st trial	2	17			2	3	0.3212
		2nd trial	0	27			2	4	0
		3rd trial	4	22			2	5	0
	60 μm	1st trial	3	30			3	4	0
		2nd trial	5	31			3	5	0
		3rd trial	3	21			4	5	0.488
piezoKO，ppk1Δ5	30 μm	1st trial	1	21
		2nd trial	0	20
		3rd trial	1	18
	60 μm	1st trial	0	22
		2nd trial	1	20
		3rd trial	1	16
