# Supplementary material for: Drosophila mechanical nociceptors preferentially sense localized poking
Source: eLife journal article supplement (doi:10.7554/elife.76574), 2022-10-06
Supplement: supp [file Figure6_source data 1.xlsx]

## Sheet: Figure. 6A
	wt c4da			wt c4da incubated with 5 μM nimodipine			Ca-α1Di c4da			Ca-α1DX10/AR66 c4da
time (sec)	F/F0 in soma	F/F0 in dendrite p1	F/F0 in dendrite p2	F/F0 in soma	F/F0 in dendrite p1	F/F0 in dendrite p2	F/F0 in soma	F/F0 in dendrite p1	F/F0 in dendrite p2	F/F0 in soma	F/F0 in dendrite p1	F/F0 in dendrite p2
0	1.0525	1.01524	0.971887	0.983411	0.995793	0.983046	0.990513	0.988841	0.973922	0.996659	1.02327	0.990048
0.13	1.01749	0.984877	0.977184	0.987678	1.00672	0.9743	1.01566	0.976919	0.955103	1.64765	0.945728	0.982827
0.26	1.01844	1.00488	0.972458	0.990787	1.00016	0.977883	1.01031	0.97006	1.02317	0.999301	1.03836	0.964461
0.39	1.00643	0.980885	0.993888	0.953388	0.976342	0.973337	0.999676	1.03734	1.00127	1.00867	1.005	1.01818
0.52	0.986492	0.998952	0.958605	0.994578	1.00153	1.00116	0.999692	0.978552	0.937145	0.979272	0.990636	0.947252
0.65	1.00306	0.995403	0.994622	0.975919	0.996128	1.02377	1.01059	1.01579	0.977033	0.993591	0.927092	0.998242
0.78	0.985705	1.00052	0.967161	0.996849	1.00558	0.966324	1.00303	0.982417	0.989035	0.987272	0.97782	0.957876
0.91	1.00323	0.954188	0.996252	0.963988	0.993575	0.960005	1.01286	0.985847	0.974573	0.991962	0.908636	0.976842
1.04	1.0075	0.985563	0.990955	0.980504	0.981482	1.0074	1.02217	1.02624	0.975847	0.987328	0.968	0.927945
1.17	1.02654	0.996007	0.96488	0.998899	0.994789	0.983702	0.988362	0.989984	1.02466	0.968621	0.980544	1.00209
1.3	0.99262	0.980199	0.957138	0.977147	0.985795	1.0153	0.989659	1.00174	1.01651	1.00133	0.985544	0.958548
1.43	0.985422	0.964391	0.951027	0.945969	0.995652	0.978423	1.00375	0.984649	1.00516	0.110086	0.509908	0.413318
1.56	1.00035	0.991894	0.957383	1.00956	1.00533	0.978885	0.984144	0.95509	0.965801	0.109334	0.500944	0.398612
1.69	0.994073	1.01432	0.955508	0.978465	1.0123	0.975109	0.999588	0.971747	0.974366	0.106926	0.471856	0.426555
1.82	0.999112	0.935113	0.982073	0.990368	0.981746	0.998228	0.980163	0.994556	1.0088	0.106511	0.469528	0.435439
1.95	0.978478	0.974836	0.963494	0.958709	0.999595	0.964975	0.988665	1.00544	1.00092	0.107088	0.491492	0.420673
2.08	1.00316	0.974796	0.933425	0.950391	0.986763	0.999307	0.997044	0.966739	0.98942	0.463004	0.59018	0.6358
2.21	0.989112	0.981247	0.985496	0.965492	0.995564	0.985281	0.961496	0.99951	0.970572	0.752118	0.758036	0.962633
2.34	0.988407	0.955438	0.995763	0.995213	0.992589	0.992911	0.987213	0.998802	0.957089	0.799278	0.872	0.92093
2.47	1	0.960882	0.982725	0.98143	0.983331	1.01314	0.980205	0.928416	0.999467	0.83456	0.874036	0.944042
2.6	0.986905	1.00073	0.958524	1.00245	0.989685	0.981312	0.965368	0.998313	0.989657	0.865711	0.8848	0.947252
2.73	0.973215	0.925717	0.979629	0.954008	0.98194	0.994298	0.992956	0.988187	1.00151	0.888091	0.839272	0.991576
2.86	0.989132	0.998347	0.954612	0.986349	0.962858	1.00559	0.982387	0.999347	0.980115	0.930516	0.835056	1.00616
2.99	0.969435	0.959431	0.973517	0.982659	0.991638	1.01957	0.961579	0.980022	0.96426	0.938097	0.791636	1.02668
3.12	0.982217	0.957495	0.970095	0.994779	0.984263	0.981197	0.982579	0.99423	0.993273	0.961279	0.788656	1.12851
3.25	0.282793	0.815704	0.933181	0.425473	0.851065	0.836975	0.611523	0.778716	0.945501	0.975423	0.78378	1.04576
3.38	0.282118	0.823204	0.920958	0.421353	0.867981	0.852079	0.431059	0.705444	0.963757	0.988952	0.786544	1.08359
3.51	0.280222	0.830907	0.948419	0.422857	0.862155	0.861673	0.422326	0.731954	0.957711	1.00016	0.870692	1.11299
3.64	0.282772	0.813082	0.924462	0.428411	0.885513	0.847994	0.395789	0.726456	0.928491	1.01571	0.846836	1.11988
3.77	0.27503	0.819175	0.938559	0.422395	0.863704	0.837938	0.392839	0.717692	0.943368	1.03751	0.854764	1.13559
3.9	0.541183	0.842482	0.928292	0.43424	0.855219	0.835279	0.389188	0.718248	1.00658	1.04025	0.820872	1.14027
4.03	0.579353	0.854445	0.95119	0.42219	0.853018	0.827804	0.388544	0.720859	0.988768	1.05947	0.865672	1.11258
4.16	0.599437	0.879533	0.944671	0.431345	0.8536	0.862482	0.381854	0.697042	0.994735	1.07623	0.918256	1.17602
4.29	0.651482	0.926825	0.952331	0.42462	0.867928	0.847031	0.37381	0.707847	0.981178	1.08627	0.922256	1.20213
4.42	0.75505	1.0714	1.08906	0.427093	0.856768	0.827033	0.38409	0.704516	0.961083	1.07821	0.919708	1.17666
4.55	0.751505	1.18812	1.10504	0.425519	0.8674	0.857242	0.396052	0.720409	1.00215	1.0865	0.839056	1.21307
4.68	0.801403	1.27725	1.13486	0.425547	0.855588	0.842061	0.871607	0.842826	0.975211	1.09095	0.964872	1.18475
4.81	0.794318	1.25676	1.19475	0.830946	0.821528	0.978076	0.989025	0.982937	0.978545	1.11404	0.952728	1.16358
4.94	0.822535	1.32012	1.23924	0.924287	0.830822	0.979347	0.999716	0.998424	0.978018	1.10328	0.902108	1.2273
5.07	0.817778	1.2505	1.27216	0.95836	0.855624	0.976458	1.0066	1.03048	0.977317	1.13905	0.99222	1.23459
5.2	0.857232	1.32369	1.2315	0.985609	0.867647	0.966748	1.00296	1.03818	0.993551	1.14896	0.975856	1.21068
5.33	0.904227	1.31558	1.29946	1.03447	0.901391	0.997804	1.00852	1.04633	1.00772	1.13633	0.973744	1.216
5.46	0.930688	1.31902	1.33629	1.00654	0.907587	0.973259	1.03396	0.995768	1.00891	1.14302	0.980944	1.20896
5.59	0.965915	1.31393	1.30329	0.993333	0.914786	0.958502	0.997517	1.047	0.995964	1.15925	1.08174	1.21749
5.72	1.00004	1.3719	1.38429	1.01262	0.924995	0.996841	1.01141	1.05709	1.01242	1.10972	0.870764	1.16397
5.85	1.00793	1.35644	1.31755	0.997496	0.952051	0.974376	1.02754	1.01418	0.995086	1.16765	0.967928	1.15937
5.98	1.06497	1.38993	1.3433	0.994578	0.948706	0.971564	1.0104	0.997659	0.989075	1.17175	1.12189	1.19253
6.11	1.06051	1.35595	1.35096	0.990543	0.952544	0.984163	1.01013	1.0258	0.990084	1.14686	0.987344	1.17707
6.24	1.05334	1.41618	1.42202	1.03073	0.965006	1.00247	0.97942	1.00626	0.99943	1.15767	0.96022	1.18146
6.37	1.1344	1.40986	1.38087	1.01854	0.958493	0.983046	1.01095	1.0244	0.944016	1.10806	0.757672	1.16341
6.5	1.16415	1.40385	1.39456	1.03421	0.971202	0.974261	1.00739	1.07402	0.995964	1.13064	0.8696	1.17596
6.63	1.18956	1.48905	1.35667	0.998004	0.966344	0.986321	1.02256	1.02661	0.993945	1.17732	1.0624	1.22815
6.76	1.27261	1.43188	1.42275	1.01402	0.94802	0.982738	0.994914	1.03255	1.00877	1.16854	1.19178	1.21328
6.89	1.2755	1.48034	1.40336	0.998628	0.992888	0.968481	0.992466	0.994687	0.994165	1.20667	1.18953	1.2841
7.02	1.32889	1.50696	1.4045	0.996527	0.989474	0.974454	0.995379	1.03399	1.0315	1.18456	1.06393	1.23945
7.15	1.36103	1.48899	1.3807	1.01646	0.992519	1.02223	0.986414	0.999369	1.01799	1.18946	1.10589	1.19415
7.28	1.38091	1.55413	1.36367	1.00774	0.968492	0.998266	0.991939	1.01936	1.0054	1.23159	1.22844	1.21905
7.41	1.37936	1.47445	1.41851	1.02612	0.972294	1.00162	0.98495	1.01117	1.01426	1.21013	1.05374	1.20973
7.54	1.42798	1.53947	1.46292	1.008	0.996321	0.975918	0.986341	1.00702	0.994165	1.2213	1.1712	1.24941
7.67	1.43343	1.46721	1.45901	1.02712	0.961785	1.01803	0.988034	1.00594	1.00807	1.21531	1.17273	1.22953
7.8	1.49764	1.53506	1.38967	1.00832	0.993804	0.996686	0.979042	0.996849	1.00584	1.21357	1.19476	1.23605
7.93	1.51448	1.55928	1.48044	1.02172	0.993909	1.02389	1.01045	1.00117	0.960776	1.2204	1.16713	1.21515
8.06	1.52764	1.52714	1.45689	1.01621	1.0004	0.988325	0.989935	1.02035	0.982406	1.23862	1.09986	1.26525
8.19	1.56865	1.59314	1.38983	0.996151	0.976958	0.982854	0.978697	1.04156	1.02308	1.24493	1.15098	1.26235
8.32	1.55273	1.5572	1.43603	1.02278	0.967418	0.974107	0.988161	0.990275	0.949895	1.25499	1.21331	1.23557
8.45	1.62002	1.55542	1.44386	1.00227	0.992378	1.01711	0.981943	1.01198	0.994384	1.25083	1.17949	1.2141
8.58	1.63095	1.60179	1.48664	1.01228	0.983119	0.961854	0.987312	0.994913	1.00307	1.25032	1.11346	1.2736
8.71	1.71337	1.52868	1.51988	1.01034	0.978437	0.97245	0.982063	1.01567	0.996709	1.2486	1.19956	1.2283
8.84	1.66923	1.52046	1.42047	1.00419	0.994068	0.980811	1.00494	1.01333	0.985741	1.23752	1.1856	1.24396
8.97	1.69592	1.6062	1.47107	1.01539	0.986534	1.00805	0.97917	1.02121	0.971086	1.25802	1.14422	1.21988
9.1	1.70461	1.51328	1.45926	0.998814	0.980285	0.984896	0.976161	0.998064	0.974859	1.25734	1.16066	1.22889
9.23	1.71433	1.55069	1.41925	1.00716	0.976254	0.983817	0.953193	1.01112	0.954107	1.28178	1.18087	1.25087
9.36	1.7269	1.57547	1.47686	0.98393	0.985285	1.00697	0.967197	1.02899	0.9692	1.27829	1.25614	1.22339
9.49	1.74518	1.54757	1.45535	1.01497	0.978665	0.960659	0.993274	1.00918	1.01312	1.25702	1.17804	1.23069
9.62	1.74438	1.57401	1.38339	0.996791	0.961644	1.01838	0.98278	1.03287	1.01233	1.27168	1.21178	1.21733
9.75	1.73766	1.5856	1.40727	0.997368	1.00048	1.04134	1.02138	1.03098	0.986837	1.26683	1.192	1.20205
9.88	1.756	1.52113	1.44989	0.996473	0.993311	0.962586	0.992425	1.00342	0.98008	1.28064	1.18814	1.27727
10.01	1.77019	1.61694	1.47914	1.03269	0.971713	0.992679	1.00237	0.984017	0.944454	1.29559	1.27862	1.25958
10.14	1.83226	1.57358	1.43954	1.00676	0.982415	0.978115	0.993228	1.00851	0.964724	1.25923	1.19134	1.21816
10.27	1.82648	1.52218	1.43815	0.94805	0.977997	0.977498	1.00172	0.969475	0.908301	1.27855	1.23542	1.22455
10.4	1.80339	1.56953	1.44426	0.99938	0.975867	0.983316	0.998644	1.0122	0.922911	1.27812	1.12909	1.22098
10.53	1.81749	1.56591	1.43563	1.03056	0.961855	0.973182	0.992513	0.99095	0.882897	1.26958	1.16284	1.23336
10.66	1.85094	1.60418	1.42666	1.00466	0.986939	0.971525	1.00116	1.03949	0.907072	1.27106	1.17142	1.24992
10.79	1.82952	1.53793	1.39993	1.01746	0.967981	1.00959	0.99867	1.02557	0.959021	1.27734	1.13418	1.1831
10.92	1.82455	1.59369	1.47009	1.01811	0.9931	1.00008	0.969423	0.975372	0.955511	1.28662	1.21549	1.2189
11.05	1.80567	1.53935	1.41053	0.991872	0.986868	0.970023	0.981707	0.966863	0.947876	1.27787	1.12931	1.21189
11.18	1.81975	1.54002	1.42528	0.999132	0.995036	0.986707	0.983326	0.957183	0.998245	1.27597	1.23862	1.21094
11.31	1.81903	1.50954	1.4507	1.0137	0.994208	0.985474	0.980918	0.970465	0.961828	1.2559	1.17571	1.20113
11.44	1.82783	1.50021	1.42935	0.997702	0.974652	1.00852	0.976849	0.969384	0.99728	1.25575	1.23047	1.18957
11.57	1.83513	1.48555	1.36017	0.980953	0.981288	0.988864	0.974469	0.988969	0.946911	1.27882	1.11127	1.16366
11.7	1.83174	1.47439	1.40792	1.0096	0.990407	0.998921	0.983251	0.995138	0.964154	1.25486	1.10866	1.24122
11.83	1.82736	1.59523	1.41371	1.01591	0.997448	0.980002	0.960661	1.04115	0.990479	1.24674	1.15687	1.15642
11.96	1.85237	1.49126	1.44019	1.01189	1.00116	0.968867	0.95741	0.982081	0.994779	1.23254	1.11978	1.20611
12.09	1.81611	1.52929	1.44801	1.03133	0.996568	0.959542	0.948931	1.00441	1.01246	1.23167	1.17913	1.1999
12.22	1.83876	1.56836	1.42903	1.0046	1.0032	1.00143	0.974146	0.993607	0.957091	1.24299	1.17986	1.12509
12.35	1.83746	1.5694	1.47115	1.01699	0.987467	0.980966	0.967048	0.990185	0.98324	1.24527	1.18116	1.1659
12.48	1.83578	1.54112	1.39268	1.00029	0.988541	0.96328	0.979481	0.993742	0.955643	1.23873	1.24822	1.20247
12.61	1.85546	1.51855	1.40825	1.01274	0.98414	0.972335	0.967136	0.992977	1.01088	1.2275	1.15396	1.19302
12.74	1.84317	1.5905	1.43465	1.00506	0.982222	0.967056	0.969362	0.996849	0.988373	1.22653	1.17622	1.15606
12.87	1.83007	1.45967	1.41061	1.03295	0.993998	0.992448	0.95637	1.00612	0.986925	1.20399	1.08698	1.20688
13	1.84109	1.49372	1.37084	1.01683	0.977944	0.9832	0.962481	0.986223	0.959109	1.22428	1.14858	1.16263
13.13	1.85	1.50739	1.43041	1.0003	0.99141	0.954186	0.966144	1.02593	0.955072	1.22436	1.10066	1.2038
13.26	1.84397	1.50003	1.34689	0.990426	1.00107	0.971217	0.962448	0.98046	0.964988	1.23052	1.16334	1.1387
13.39	1.81237	1.43599	1.42251	1.02294	0.981852	0.967441	0.95695	0.981451	0.98947	1.21361	1.15607	1.17609
13.52	1.84058	1.5015	1.44451	0.990019	0.990565	0.996763	0.961389	0.987754	0.96139	1.21488	1.10531	1.19528
13.65	1.79947	1.47599	1.3552	0.978481	0.996321	0.974146	0.9715	0.983026	0.915277	1.21774	1.10014	1.20837
13.78	1.81018	1.55051	1.38323	1.00975	0.993663	0.973837	0.951858	1.02287	1.03291	1.20339	1.08233	1.15773
13.91	1.81423	1.5318	1.34917	1.01371	0.979598	0.968636	0.954354	0.997614	0.982845	1.20494	1.14109	1.16746
14.04	1.80152	1.45396	1.37296	0.969209	0.994772	0.947945	0.951002	1.02355	0.956301	1.20411	1.11571	1.18464
14.17	1.78243	1.49813	1.43652	0.99588	0.978261	0.98898	0.944511	1.01432	0.968936	1.20025	1.10974	1.1669
14.3	1.7701	1.49212	1.37427	0.974822	0.978578	0.989712	0.959136	0.974922	0.98302	1.19775	1.16749	1.15008
14.43	1.82821	1.49893	1.35976	0.997008	0.96571	0.970408	0.952667	0.966773	0.970691	1.20774	1.14851	1.1869
14.56	1.77838	1.48647	1.35316	0.976934	0.988488	0.973221	0.953726	0.996263	0.988636	1.19463	1.12007	1.23272
14.69	1.75111	1.5188	1.29685	0.987922	0.979405	0.964821	0.941153	0.917023	0.987847	1.20685	1.08276	1.1641
14.82	1.72742	1.50334	1.39268	0.994128	0.983472	0.987863	0.964567	1.00761	0.950334	1.21352	1.04167	1.17994
14.95	1.72521	1.48096	1.35104	0.977295	0.978631	1.00158	0.926224	0.985098	0.908082	1.19506	1.1224	1.14723
15.08	1.71917	1.41532	1.29351	0.987795	0.971202	0.967325	0.952094	0.977804	0.956301	1.19188	1.10749	1.15585
15.21	1.71945	1.45924	1.25277	0.953589	0.982644	0.996224	0.932889	0.994868	1.01101	1.18765	1.14487	1.14186
15.34	1.7408	1.51855	1.23851	1.02314	0.973702	0.971487	0.926561	0.96038	0.975869	1.17126	1.08233	1.12101
15.47	1.70875	1.46145	1.26858	1.00784	0.963897	0.963395	0.942623	0.96979	0.973587	1.17099	1.12364	1.13721
15.6	1.6744	1.41085	1.25171	1.01511	1.00988	0.959041	0.951123	0.994913	0.972491	1.20372	1.08611	1.19458
15.73	1.67188	1.41581	1.24658	1.0197	0.979123	0.976766	0.959216	0.965153	0.96218	1.17398	1.08604	1.15521
15.86	1.65479	1.48997	1.23468	1.01205	0.992835	0.994528	0.966745	0.978974	0.983064	1.16373	1.07607	1.17044
15.99	1.67148	1.48384	1.23965	0.982357	0.968914	0.970215	0.948492	0.961371	0.940944	1.16654	1.12894	1.16846
16.12	1.66069	1.47212	1.21961	0.958159	0.996515	0.977729	0.956215	0.985908	0.91361	1.17308	1.17164	1.1529
16.25	1.65344	1.44477	1.31291	0.958868	1.00042	0.98609	0.961437	1.02881	0.989514	1.17393	1.09134	1.17984
16.38	1.65869	1.44225	1.2161	0.995992	0.97298	0.950719	0.930914	0.956598	0.93546	1.17034	1.08414	1.09818
16.51	1.63414	1.41765	1.34257	0.981938	0.97342	0.980889	0.953619	0.959119	0.970604	1.17057	1.11913	1.10693
16.64	1.66425	1.4728	1.24405	0.975256	0.988558	0.973144	0.942218	0.939084	0.961828	1.15419	1.04066	1.15627
16.77	1.61322	1.43863	1.23175	1.00107	0.985618	1.00397	0.949739	0.989465	0.953273	1.16152	1.13491	1.13824
16.9	1.61639	1.4155	1.2544	0.977019	1.01473	0.970023	0.955216	0.974112	0.956169	1.15295	1.12706	1.15342
17.03	1.61904	1.39717	1.27314	0.998915	0.989016	0.962702	0.954847	0.995363	0.990128	1.13278	1.032	1.15968
17.16	1.59821	1.39385	1.14439	1.02964	0.996849	0.986321	0.956715	0.968619	0.95981	1.12729	1.05942	1.14276
17.29	1.63028	1.44078	1.26768	0.984655	1.01098	0.975957	0.942352	0.93985	0.958055	1.13971	1.15156	1.13292
17.42	1.59472	1.46133	1.22352	0.980694	0.998275	1.00077	0.960607	0.957049	0.977975	1.13325	1.0304	1.13023
17.55	1.58305	1.40434	1.23957	1.00455	0.988682	0.970254	0.9446	0.946243	0.957793	1.13511	1.05127	1.13911
17.68	1.58047	1.40741	1.1448	0.978105	1.00454	0.974801	0.925975	1.0439	0.988417	1.14478	1.08858	1.13903
17.81	1.54903	1.43182	1.19361	0.966477	1.01623	0.969445	0.950847	0.995948	0.968147	1.12184	1.06727	1.16654
17.94	1.52712	1.46164	1.19785	0.983717	0.997659	0.953685	0.932808	1.02584	0.961522	1.12068	1.11346	1.14425
18.07	1.54878	1.36368	1.21846	0.973159	0.995898	0.97195	0.940856	1.05155	0.982626	1.12477	1.07273	1.12442
18.2	1.52399	1.40416	1.18889	1.02026	1.01185	1.0198	0.941057	0.99991	0.924535	1.11184	1.04786	1.1444
18.33	1.53017	1.44998	1.17878	0.99507	0.991832	0.982198	0.947251	1.00113	0.982932	1.13286	1.1024	1.1528
18.46	1.50353	1.3922	1.11376	0.987922	0.999877	0.958579	0.974199	0.990546	0.935591	1.12289	1.05993	1.06998
18.59	1.47652	1.31565	1.13388	0.956597	1.00787	0.96405	0.931412	1.00243	0.940023	1.12951	1.11251	1.15511
18.72	1.4944	1.38858	1.17324	0.979624	1.00428	0.986128	0.950259	0.992211	0.965207	1.11738	1.06996	1.13428
18.85	1.48816	1.35294	1.14228	0.92669	0.991375	0.968944	0.933793	0.977308	0.974377	1.12486	1.07673	1.1096
18.98	1.45585	1.37122	1.15914	0.959678	0.976184	0.958618	0.921772	0.968124	0.94463	1.12895	1.0488	1.13338
19.11	1.4487	1.36006	1.11416	0.987519	0.989843	0.990367	0.96551	0.986133	0.935109	1.06729	1.17491	1.11456
19.24	1.44495	1.30982	1.09624	0.983787	0.990952	0.974338	0.942906	0.997524	0.936732	1.08801	1.05644	1.15049
19.37	1.46561	1.31828	1.1382	0.961992	0.971942	0.987554	0.958205	1.01238	0.897245	1.09506	1.04414	1.12252
19.5	1.4454	1.34926	1.12671	0.962326	0.989861	0.966439	0.9441	1.0317	0.867585	1.10301	1.1064	1.11818
19.63	1.43706	1.34595	1.1316	0.971349	0.987731	0.97588	0.90068	1.00837	0.901281	1.09798	1.09156	1.08074
19.76	1.4187	1.3062	1.11506	0.964783	0.996761	0.948831	0.919615	0.996308	0.964286	1.08865	1.06793	1.14967
19.89	1.40882	1.3078	1.06356	0.951725	0.984633	0.956729	0.953437	1.00531	0.995393	1.10886	1.06298	1.13382
20.02	1.39105	1.33901	1.05403	0.945969	0.971378	0.955342	0.971393	1.01049	0.99807	1.09354	0.99818	1.08223
20.15	1.3969	1.34024	1.07529	0.994589	1.00738	0.946403	0.927776	0.99518	1.02378	1.09824	1.04851	1.10457
20.28	1.38033	1.28835	1.05761	0.946314	0.988295	0.960814	0.900431	0.954662	0.969287	1.0872	1.05862	1.09712
20.41	1.38267	1.30534	1.06894	0.952996	0.981535	0.970678	0.966981	0.982531	0.96626	1.07408	1.06974	1.12596
20.54	1.35301	1.25419	1.10756	0.971857	0.998064	1.01379	0.963366	0.974652	0.982494	1.11037	1.08793	1.07576
20.67	1.33927	1.23462	1.0625	0.97057	1.00697	0.953223	0.926623	0.962541	0.976483	1.07725	1.04342	1.09918
20.8	1.33577	1.26829	1.06128	0.994705	1.00151	0.939815	0.941598	0.976498	0.9649	1.06128	1.00182	1.08662
20.93	1.35232	1.3078	1.06543	0.988271	0.998116	0.970138	0.933678	1.01715	0.979686	1.07256	1.0696	1.08901
21.06	1.30339	1.25861	1.09966							1.06294	1.03964	1.14964
21.19	1.30739	1.33025	1.04637							1.05283	1.01331	1.08901
21.32	1.30908	1.19414	1.0744							1.07269	0.964436	1.07748
21.45	1.3076	1.25185	1.03496							1.05045	1.05418	1.101
21.58	1.28062	1.2751	1.02681							1.04862	1.104	1.07922
21.71	1.26333	1.23947	1.01744							1.05865	1.02116	1.06217
21.84	1.26225	1.19726	1.04897							1.04353	0.993456	1.11066
21.97	1.26594	1.23358	1.07839							1.05698	1.0352	1.06382
22.1	1.27687	1.23909	1.03805							1.02709	0.992436	1.06474
22.23	1.23504	1.25185	0.994785							1.04746	0.925236	1.05788
22.36	1.22256	1.21051	1.00016							1.02368	1.02247	1.06762
22.49	1.20727	1.25584	1.03846							1.03279	1.06742	1.03577
22.62	1.23812	1.22775	1.04889							1.02095	0.96378	1.04345
22.75	1.22721	1.19536	1.02705							1.04359	1.06094	1.02635
22.88	1.1767	1.20885	1.00196							1.03303	0.995636	1.07935
23.01	1.1801	1.21499	0.976451							1.02463	1.03062	1.00904
23.14	1.1804	1.18996	0.946626							1.02998	1.06546	1.03672
23.27	1.18996	1.20941	0.945323							1.01613	0.996072	1.03241
23.4	1.17136	1.15408	1.00725							1.01355	1.00844	1.02409
23.53	1.16495	1.15543	1.01964							1.01374	1.03542	1.05701
23.66	1.16379	1.21143	0.995925							1.01292	1.04626	1.03295
23.79	1.1621	1.11863	1.0396							0.984983	1.09527	1.01423
23.92	1.17047	1.19088	1.01141							1.00218	0.956436	0.996506
24.05	1.13073	1.19414	0.991769							0.989223	1.01411	1.01138
24.18	1.11745	1.15107	0.981992							0.980081	1.00458	0.998382
24.31	1.15731	1.16844	1.02779							0.988058	0.974472	0.971724
24.44	1.11247	1.18291	0.977998							0.995976	0.938328	1.00126
24.57	1.11557	1.12893	0.947197							0.979125	1.02167	0.97807
24.7	1.1034	1.18304	0.976043
24.83	1.12267	1.16758	1.00285
24.96	1.12133	1.16414	1.0075
25.09	1.09963	1.19555	0.983458
25.22	1.0952	1.08593	0.998778
25.35	1.07009	1.11096	0.999674
25.48	1.07177	1.10593	0.992258
25.61	1.08534	1.13372	0.999022
25.74	1.09992	1.10152	0.95779
25.87	1.09784	1.1212	0.997311
26	1.07216	1.13016	0.963168
26.13	1.08581	1.09403	1.00627
26.26	1.07041	1.10697	0.968872
26.39	1.07309	1.10023	1.00554
26.52	1.03992	1.09642	0.978487
26.65	1.04326	1.10299	1.00953
26.78	1.02081	1.076	1.0057
26.91	1.03298	1.11323	0.952982
27.04	1.04145	1.07287	0.986555
27.17	1.03829	1.07937	1.01467
27.3	1.00771	1.0722	1.00815
27.43	1.01312	1.07655	1.01402
27.56	0.989835	1.05962	0.978243
27.69	1.01225	1.05876	0.957301
27.82	0.997982	1.08213	0.969361
27.95	0.988455	1.03729	0.965613
28.08	1.00748	1.03079	1.04832
28.21	1.00046	1.04484	1.0013
28.34	1.00758	1.11832	1.01067
28.47	0.983147	1.08182	0.944426
28.6	0.991897	1.04312	0.99617
28.73	0.971023	1.02956	0.964635
28.86	0.966375	0.996139	0.960561
28.99	0.969	1.05122	1.00334
29.12	0.977363	1.02993	0.975228
29.25	0.980152	1.05428	0.96162
29.38	0.94979	1.02442	0.954368
29.51	0.97283	1.04423	0.991933
29.64	0.94708	1.00791	0.969931
29.77	0.94095	0.985219	0.982969
29.9	0.951545	0.983131	0.974414
30.03	0.944433	1.01662	0.953308
30.16	0.955465	1.03453	0.992911
30.29	0.947732	1.00858	0.999348
30.42	0.95084	1.05318	0.956975
30.55	0.929325	1.03699	0.950782
30.68	0.916682	1.01442	0.983621
30.81	0.929737	1.01123	1.02493
30.94	0.944597	1.03367	0.973517
31.07	0.933943	0.995642	0.996333
31.2	0.931175	1.02128	0.976369
31.33	0.929057	1.0111	1.0066
31.46	0.93288	0.995949	0.948745
31.59	0.921482	0.990248	0.980443
31.72	0.911732	0.969518	0.999022
31.85	0.906425	1.03674	1.00896
31.98	0.899245	0.980803	0.972865
32.11	0.909005	0.976693	0.979954
32.24	0.890988	0.992949	0.952412
32.37	0.906763	0.945898	1.01312
32.5	0.889487	1.01355	0.94736
32.63	0.880112	0.979387	0.978325
32.76	0.888425	0.958964	0.942064
32.89	0.873112	1.0073	0.960886
33.02	0.886068	0.963139	0.926663
33.15	0.86904	0.943569	0.969036
33.28	0.86792	0.944796	0.950212
33.41	0.863648	0.973745	0.976939
33.54	0.896277	0.994912	0.997066
33.67	0.86804	0.957372	0.95396
33.8	0.871705	0.974606	1.01263
33.93	0.866535	0.952584	0.977184
34.06	0.86916	0.948781	0.956649
34.19	0.865228	0.959212	0.960153
34.32	0.872665	0.994358	0.939211
34.45	0.85488	0.937803	0.949479
34.58	0.854075	0.976263	0.979465
34.71	0.858267	0.971168	0.970502
34.84	0.855527	0.957431	0.992829
34.97	0.85884	0.982394	0.967487
35.1	0.834442	0.95473	1.01899
35.23	0.851263	0.96019	0.957546
35.36	0.85216	0.990307	0.987207

## Sheet: Figure. 6B
dendritic p1 F/F0
wt c4da	wt c4da in 1% DMSO	wt c4da incubated with 2.5 μM nimodipine	wt c4da incubated with 5.0 μM nimodipine	scrambled RNAi c4da	Ca-α1Di c4da	Ca-α1Dx10/AR66 c4da	p value of U-test	p-value of Kruskal-Wallis test for different nimodipine concentration
1.1841	1.53201	2.60491	1.04697	2.2501	0.98309	1.05509	wt c4da <-> wt c4da in 1% DMSO: 0.970	wt c4da in 1% DMSO <-> wt c4da incubated with 2.5 μM nimodipine: 1
1.26977	1.38621	1.9183	1.14208	1.9414	1.79953	1.30571	wt c4da <-> scrambled RNAi c4da: 0.967	wt c4da in 1% DMSO <-> wt c4da incubated with 5.0 μM nimodipine: 8.44742E-4
1.2409	0.82859	1.76399	1.01379	1.52861	1.6814	1.10712	wt c4da <-> Ca-α1Di c4da: 0.011	wt c4da incubated with 2.5 μM nimodipine <-> wt c4da incubated with 5.0 μM nimodipine: 0.003
2.13584	2.10946	1.57488	0.94924	1.48102	0.95648	1.18352	wt c4da <-> Ca-α1DX10/AR66 c4da: 0.001
1.62972	1.35524	1.5042	1.0658	1.3666	0.99963	1.20332
1.67582	1.65643	1.36144	0.90113	1.36144	1.03232	1.13539
1.76538	1.9991	1.31	1.03501	1.32155	1.03323	1.74374
1.35416	1.61574	1.31	1.13543	1.19427	1.0065	0.96089
1.7464	1.20507	1.27913	0.8687	1.16339	1.01002	0.9989
1.16256	1.5103	1.18526	1.18725		1.05631	1.31751
		1.13768	1.13779
		1.07207	1.48497
		1.0579	0.99408
			1.01004
			1.0292
			1.09179
			1.11261
			1.21308
			1.1619

## Sheet: Figure. 6C
F/F0 to 4 mN proximal stimuli (60 μm probe)						F/F0 to 4 mN distal stimuli (60 μm probe)
wt c4da	wt c4da in 1% DMSO	wt c4da incubated with 2.5 μM nimodipine	wt c4da incubated with 5.0 μM nimodipine	p value of U-test		wt c4da	wt c4da in 1% DMSO	wt c4da incubated with 2.5 μM nimodipine	wt c4da incubated with 5.0 μM nimodipine	p value of t-test
2.19717	2.05721	2.26964	1.1846	wt c4da <-> wt c4da in 1% DMSO: 0.519		1.59916	1.99421	1.518	1.07043	wt c4da <-> wt c4da in 1% DMSO: 0.898
2.12	2.02702	1.69818	2.00312			1.44793	1.88063	1.2	1.91916
1.40594	1.98679	1.59054	1.15421			1.9209	1.73269	1.55939	1.09722
1.7562	1.78646	1.88548	1.16888			1.03654	1.71873	1.77635	1.02002
1.69772	1.70511	1.03426	1.03512			1.33284	1.64848	1.45976	1.07294
1.78638	1.706	1.55428	1.96172			1.48264	1.61053	1.30155	1.47808
1.69557	1.71237	1.47384	1.03559	p-value of Kruskal-Wallis test for different nimodipine concentration		2.00261	1.51685	1.20827	0.97538	p-value of Kruskal-Wallis test for different nimodipine concentration
1.13526	1.68316	1.44937	1.12644	wt c4da in 1% DMSO <-> wt c4da incubated with 2.5 μM nimodipine: 0.755		1.28307	1.46553	1.42112	0.98156	wt c4da in 1% DMSO <-> wt c4da incubated with 2.5 μM nimodipine: 0.622
1.3753	1.62	1.46099	1.13026	wt c4da in 1% DMSO <-> wt c4da incubated with 5.0 μM nimodipine: 0.022		2.38733	1.44325	1.51247	1.01026	wt c4da in 1% DMSO <-> wt c4da incubated with 5.0 μM nimodipine: 3.92176E-4
1.28332	1.53864	1.08922	1.81212	wt c4da incubated with 2.5 μM nimodipine <-> wt c4da incubated with 5.0 μM nimodipine: 0.394		1.07506	1.40082	1.32178	0.99755	wt c4da incubated with 2.5 μM nimodipine <-> wt c4da incubated with 5.0 μM nimodipine: 0.041
1.13219	1.49654	2.01278	1.06099			1.693	1.3774	1.25273	1.46792
1.08132	1.45076	1.4708	1.339			1.57	1.36622	1.119	1.21014
1.32792	1.38948						1.34843	1.545	1.05313
1.01267							1.29645		1.23053
1.38669									1.11459
3.15239
1.85
1.8022
1.75692
2.0861

## Sheet: Figure. 6D
F/F0 to 1.5 mN proximal stimuli (30 μm probe)						F/F0 to 1.5 mN distal stimuli (30 μm probe)
wt c4da	wt c4da in 1% DMSO	wt c4da incubated with 2.5 μM nimodipine	wt c4da incubated with 5.0 μM nimodipine	p value of t-test		wt c4da	wt c4da in 1% DMSO	wt c4da incubated with 2.5 μM nimodipine	wt c4da incubated with 5.0 μM nimodipine	p value of t-test
1.18991	2.19302	1.20011	1.14891	wt c4da <-> wt c4da in 1% DMSO: 0.071		1.45609	1.92242	1.0401	1.18991	wt c4da <-> wt c4da in 1% DMSO: 0.360
1.09118	1.98015	2.05357	1.1495			1.73794	1.73259	0.98811	1.09118
1.03346	1.90954	0.99572	1.11168			1.82105	1.60942	1.00944	1.03346
1.03985	1.86854	1.05976	1.10012			1.67543	1.55301	1.01965	1.03985
1.03854	1.78261	1.05946	1.0501			1.00182	1.50938	0.98997	1.03854
1.04764	1.69019	0.99287	1.03731			1.47871	1.47724	1.04778	1.04764
1.02321	1.68249	1.03244	1.01673	p-value of Kruskal-Wallis test for different nimodipine concentration		1.22116	1.46445	0.91805	1.02321	p-value of Kruskal-Wallis test for different nimodipine concentration
1.00008	1.61451	0.98662	1.04625	wt c4da in 1% DMSO <-> wt c4da incubated with 2.5 μM nimodipine: 5.69329E-4		1.28642	1.36055	0.99585	1.00008	wt c4da in 1% DMSO <-> wt c4da incubated with 2.5 μM nimodipine: 2.78659E-5
1.7438	1.48372	0.97312		wt c4da in 1% DMSO <-> wt c4da incubated with 5.0 μM nimodipine:0.0026		1.33699	1.32333	1.2797		wt c4da in 1% DMSO <-> wt c4da incubated with 5.0 μM nimodipine: 0.0079
2.55231	1.16687	1.35987		wt c4da incubated with 2.5 μM nimodipine <-> wt c4da incubated with 5.0 μM nimodipine: 1		1.01937	1.18352	1.05768		wt c4da incubated with 2.5 μM nimodipine <-> wt c4da incubated with 5.0 μM nimodipine: 1
2.11914		1.12736				1.6251		0.96672
2.473		1.10505				1.67291		1.02797
1.75954		1.06545				1.22586		1.04041
1.41784		1.10303				1.43491		1.12264
1.37014		1.11836				1.12		0.98925

## Sheet: Figure. 6E
F/F0 to proximal stimuli														the wt data are shown in Figure. 2C sheet in Figure2_source data table
1.5 mN force with 30 μm probe							4.0 mN force with 60 μm probe
wt c4da			wt c4da incubated with 2.5 μM nimodipine				wt c4da			wt c4da incubated with 2.5 μM nimodipine
force (mN)	mean F/F0	F/F0 error (se)	force (mN)	mean F/F0	F/F0 error (se)		force (mN)	mean F/F0	F/F0 error (se)	force (mN)	mean F/F0	F/F0 error (se)
0.19929	1.11782	0.09848	0.222	1.01518	0.01965		0.61914	0.99035	0.00945	0.72105	1.05059	6.3e-05
0.58125	1.46136	0.17268	0.57	1.0954	0.22505		1.53395	1.12361	0.03628	2.54667	1.30492	0.12821
1.10769	1.75308	0.18696	1.025	1.16	0.07174		2.68043	1.32752	0.06573	4.09201	1.57201	0.15605
1.92273	2.07777	0.20118	1.95	1.21021	0.03225		4.13333	1.65869	0.09462	6.58308	1.61941	0.18383
							6.13	1.84316	0.10538

## Sheet: Figure. 6F
F/F0 to distal stimuli														the wt data are shown in Figure. 2G sheet in Figure2_source data table
1.5 mN force with 30 μm probe							4.0 mN force with 60 μm probe
wt c4da			wt c4da incubated with 2.5 μM nimodipine				wt c4da			wt c4da incubated with 2.5 μM nimodipine
force (mN)	mean F/F0	F/F0 error (se)	force (mN)	mean F/F0	F/F0 error (se)		force (mN)	mean F/F0	F/F0 error (se)	force (mN)	mean F/F0	F/F0 error (se)
0.20357	1.03838	0.02103	0.3	1.00698	0.00902		0.705	1.01703	0.01791	0.76201	1.01061	0.00437
0.5625	1.07112	0.02628	0.675	1.00308	0.01419		1.76786	1.11403	0.03656	1.68642	1.11701	0.06344
1.0875	1.16522	0.0619	1.25625	1.04632	0.03661		3.03	1.29645	0.05896	2.96153	1.31865	0.04104
1.84615	1.4276	0.07793	1.975	1.1276	0.01698		4.48333	1.57933	0.16146	4.40572	1.44309	0.07989
							6.60882	1.76422	0.11949	6.48443	1.57943	0.0692

## Sheet: Figure. 6G
Ca-α1Di c4da F/F0 to 4 mN force 60 μm probe stimuli			Ca-α1DX10/AR66 c4da F/F0 to 4 mN force 60 μm probe stimuli				Ca-α1Di c4da F/F0 to 1.5 mN force 30 μm probe stimuli			Ca-α1DX10/AR66 c4da F/F0 to 1.5 mN force 30 μm probe stimuli				the wt c4da data are shown in Figure. 2E sheet in Figure2 source data table
proximal	distal	p value of U-test	proximal	distal	p value of U-test		proximal	distal	p value of U-test	proximal	distal	p value of U-test
0.96276	1.06862	wt c4da proximal <-> Ca-α1Di c4da proximal: 6.38067E-6	1.13302	0.98596	wt c4da proximal <-> Ca-α1DX10/AR66 c4da proximal: 0.037		0.96026	0.95635	wt c4da proximal <-> Ca-α1Di c4da proximal: 1.25877E-5	1.03996	0.94085	wt c4da proximal <-> Ca-α1DX10/AR66 c4da proximal: 5.21109E-4
0.93348	1.12989	wt c4da distal <-> Ca-α1Di c4da distal: 2.41116E-4	1.4038	1.34591	wt c4da distal <-> Ca-α1DX10/AR66 c4da distal: 0.040		0.9556	0.97963	wt c4da distal <-> Ca-α1Di c4da distal: 3.53599E-4	1.01539	1.01221	wt c4da distal <-> Ca-α1DX10/AR66 c4da distal: 8.87929E-5
1.05657	1.06655		1.30894	1.12023			1.05064	1.08357		1.80107	1.08359
1.17106	1.00406		1.13397	0.98787			0.97933	1.39653		1.01141	0.98633
1.00508	1.09516		1.67324	1.21319			1.01908	0.96965		1.17546	0.98378
0.91723	1.00055		1.7893	1.53663			0.94298	1.00401		0.93452	1.0344
0.98637	0.99845		1.04938	0.98444			0.99276	1.06835		1.06434	1.01411
1.01799	1.03717		1.13135	1.47101			0.98533	1.11359		1.05346	1.03964
1.02135	1.09679		1.66016	1.62629			1.04473	1.00281		0.94048	1.05197
0.99016	0.94736		1.62669	0.99032			1.05447	1.04171		1.33227	0.9814
0.93031	0.9998		1.27454	1.06701			1.00503	1.05276		1.29681	1.19634
0.92629	1.00312		1.12097	1.83999			1.1069	1.10613		1.15982	1.06232
0.993	1.04221		1.1798					1.02686		0.94166	1.1504
								1.1069		1.11413	0.96635
										1.01256	0.96587
										1.19647	0.97285
										2.11779	1.08596
										1.96681	1.03561
										1.10933	1.40302

## Sheet: Figure. 6H
genotype	probe size		responding num	non-responding trial num
wt	30 μm	1st trial	16	7
		2nd trial	14	4
		3rd trial	23	28			one way anova test stats
	60 μm	1st trial	16	8			probe size	Group A	Group B	p-value
		2nd trial	16	4			30 μm	1	2	0.9999		1: wt
		3rd trial	15	8				1	3	0.7941		2：ppk-gal4
ppk-gal4	30 μm	1st trial	25	2				1	4	0.0001		3：uas-Ca-α1Di
		2nd trial	12	9				1	5	0.0007		4：Ca-α1Di
		3rd trial	11	4				2	3	0.8598		5：Ca-α1DX10/AR66
	60 μm	1st trial	16	5				2	4	0.0001
		2nd trial	11	6				2	5	0.0008
		3rd trial	14	8				3	4	0.0003
uas-Ca-α1Di	30 μm	1st trial	15	6				3	5	0.003
		2nd trial	17	6				4	5	0.4182
		3rd trial	9	8			60 μm	1	2	0.994
	60 μm	1st trial	12	5				1	3	0.9988
		2nd trial	17	4				1	4	0.0001
		3rd trial	15	8				1	5	0.0007
Ca-α1Di	30 μm	1st trial	0	20				2	3	0.9615
		2nd trial	1	15				2	4	0.0001
		3rd trial	3	17				2	5	0.0011
	60 μm	1st trial	4	11				3	4	0
		2nd trial	2	19				3	5	0.0005
		3rd trial	5	19				4	5	0.3226
Ca-α1DX10/AR66	30 μm	1st trial	4	12
		2nd trial	2	8
		3rd trial	4	13
	60 μm	1st trial	8	16
		2nd trial	4	7
		3rd trial	3	9
